1 **TITLE:** Selection at the pathway level drives the evolution of gene-specific transcriptional noise

2

3 **AUTHORS:** Gustavo Valadares Barroso<sup>1</sup>; Natasa Puzovic<sup>1</sup> and Julien Y Dutheil<sup>1,2</sup>

4

5 **Affiliations:**

6 1) Max Planck Institute for Evolutionary Biology. Department of Evolutionary Genetics. August-

7 Thienemann-Straße 2 24306 Plön – GERMANY

8 2) ISEM – Institut des Sciences de l'Évolution. UMR 5554, Université de Montpellier, Place

9 Eugène Bataillon 34095 Montpellier cedex 05 – FRANCE

10

11 **Corresponding Author:**

12 Gustavo V. Barroso, Max Planck Institute for Evolutionary Biology. Department of Evolutionary

13 Genetics. August-Thienemann-Straße 2, 24306 Plön – GERMANY.

14 **ABSTRACT:**

15 Biochemical reactions within individual cells result from the interactions of molecules, often in  
16 small numbers. Consequently, the inherent stochasticity of binding and diffusion processes generate  
17 noise along the cascade that leads to the synthesis of a protein from its encoding gene. As a result,  
18 isogenic cell populations display phenotypic variability even in homogeneous environments. The  
19 extent and consequences of this stochastic gene expression have only recently been assessed on a  
20 genome-wide scale, in particular owing to the advent of single cell transcriptomics. However, the  
21 evolutionary forces shaping this stochasticity have yet to be unraveled. We took advantage of two  
22 recently published data sets of the single-cell transcriptome of the domestic mouse *Mus musculus* in  
23 order to characterize the effect of natural selection on gene-specific transcriptional stochasticity. We  
24 showed that noise levels in the mRNA distributions (*a.k.a.* transcriptional noise) significantly  
25 correlate with three-dimensional nuclear domain organization, evolutionary constraint on the  
26 encoded protein and gene age. The position of the encoded protein in biological pathways, however,  
27 is the main factor that explains observed levels of transcriptional noise, in agreement with models of  
28 noise propagation within gene networks. Because transcriptional noise is under widespread  
29 selection, we argue that it constitutes an important component of the phenotype and that variance of  
30 expression is a potential target of adaptation. Stochastic gene expression should therefore be  
31 considered together with mean expression level in functional and evolutionary studies of gene  
32 expression.

## 33 Introduction

34 Isogenic cell populations display phenotypic variability even in homogeneous environments  
35 (Spudich and Koshland 1976). This observation challenged the clockwork view of the intra-cellular  
36 molecular machinery and led to the recognition of the stochastic nature of gene expression. Because  
37 biochemical reactions result from the interactions of individual molecules in small numbers  
38 (Gillespie 1977), the inherent stochasticity of binding and diffusion processes generates noise along  
39 the biochemical cascade leading to the synthesis of a protein from its encoding gene (**Figure 1**).  
40 The study of stochastic gene expression (SGE) classically recognizes two sources of expression  
41 noise. Following the definition introduced by Elowitz et al (Elowitz et al. 2002), extrinsic noise  
42 results from variation in concentration, state and location of shared key molecules involved in the  
43 reaction cascade from transcription initiation to protein folding. This is because molecules that are  
44 shared among genes, such as ribosomes and RNA polymerases, are typically present in low copy  
45 numbers relative to the number of genes actively transcribed (Shahrezaei and Swain 2008).  
46 Extrinsic factors also include physical properties of the cell such as size and growth rate, likely to  
47 impact the diffusion process of all molecular players. Extrinsic factors therefore affect every gene in  
48 a cell equally. Conversely, intrinsic factors generate noise in a gene-specific manner. They involve,  
49 for example, the strength of cis-regulatory elements (Suter et al. 2011) as well as the stability of the  
50 mRNA molecules that are transcribed (McAdams and Arkin 1997; Thattai and Oudenaarden 2001).  
51 Every gene is affected by both sources of stochasticity and the relative importance of each has been  
52 discussed in the literature (Becskei et al. 2005; Raj and Oudenaarden 2008). Shahrezaei and Swain  
53 (Shahrezaei and Swain 2008) proposed a more general, systemic and explicit definition for any  
54 organization level, where intrinsic stochasticity is “generated by the dynamics of the system from  
55 the random timing of individual reactions” and extrinsic stochasticity is “generated by the system  
56 interacting with other stochastic systems in the cell or its environment”. This generic definition  
57 therefore includes Raser and O’Shea’s (Raser and O’Shea 2005) suggestion to further distinguish  
58 extrinsic noise occurring “within pathways” and “between pathways”. Other organization levels of  
59 gene expression are also likely to affect expression noise, such as chromatin structure (Blake et al.  
60 2003; Hebenstreit 2013), and three-dimensional genome organization (Pombo and Dillon 2015).  
61 Pioneering work by Fraser et al (Fraser et al. 2004) has shown that SGE is an evolvable trait which  
62 is subject to natural selection. First, genes involved in core functions of the cell are expected to  
63 behave more deterministically (Barkai and Leibler 1999) because temporal oscillations in the  
64 concentration of their encoded proteins are likely to have a deleterious effect. Second, genes  
65 involved in immune response (Arkin et al. 1998; Norman et al. 2015) and response to  
66 environmental conditions can benefit from being unpredictably expressed in the context of selection

67 for bet-hedging (Thattai and Oudenaarden 2004). As the relation between fitness and stochasticity  
68 depends on the function of the underlying gene, selection on SGE is expected to act mostly at the  
69 intrinsic level (Newman et al. 2006; Lehner 2008; Wang and Zhang 2011). The molecular  
70 mechanisms by which natural selection operates to regulate expression noise, however, remain to be  
71 elucidated.

72 Due to methodological limitations, seminal studies on SGE (both at the mRNA and protein levels)  
73 have focused on only a handful of genes (Elowitz et al. 2002; Ozbudak et al. 2002; Chubb et al.  
74 2006). The canonical approach consists in selecting genes of interest and recording the change of  
75 their noise levels in a population of clonal cells as a function of either (1) the concentration of the  
76 molecule that allosterically controls affinity of the transcription factor to the promoter region of the  
77 gene (Blake et al. 2003; Bar-even et al. 2006) or (2) mutations artificially imposed in regulatory  
78 sequences (Ozbudak et al. 2002). In parallel with theoretical work (Kepler and Elston 2001;  
79 Kaufmann and van Oudenaarden 2007; Sánchez and Kondev 2008), these pioneering studies have  
80 provided the basis of our current understanding of the proximate molecular mechanisms behind  
81 SGE, namely complex regulation by transcription factors, architecture of the upstream region  
82 (including the presence of TATA box), translation efficiency and mRNA / protein stability (Eldar  
83 and Elowitz 2010). Measurements at the genome scale are however needed in order to go beyond  
84 gene idiosyncrasies and particular histories, and test hypotheses about the evolutionary forces  
85 shaping SGE (Sauer et al. 2007).

86 The recent advent of single-cell RNA sequencing makes it possible to sequence the transcriptome of  
87 each individual cell in a collection of clones, and to observe the variation of gene-specific mRNA  
88 quantities across cells. This provides a genome-wide assessment of transcriptional noise. While not  
89 accounting for putative noise resulting from the process of translation of mRNAs into proteins,  
90 transcriptional noise accounts for noise generated by both synthesis and degradation of mRNA  
91 molecules (**Figure 1**). Previous studies, however, have shown that transcription is a limiting step in  
92 gene expression, and that transcriptional noise is therefore a good proxy for expression noise  
93 (Newman et al. 2006; Taniguchi et al. 2011). Here, we used publicly available single-cell  
94 transcriptomics data sets to quantify gene-specific transcriptional noise and relate it to other  
95 genomic factors, including protein conservation and position in the interaction network, in order to  
96 uncover the molecular basis of selection on stochastic gene expression.

## 97 **Results**

### 98 **A new measure of noise to study genome-wide patterns of stochastic** 99 **gene expression**

100 We used the dataset generated by Sasagawa et al (2013), which quantifies gene-specific amounts of  
101 mRNA as fragments per kilobase of transcripts per million mapped fragments (FPKM) values for  
102 each gene and each individual cell. Among these, we selected all genes in a subset containing 20  
103 embryonic stem cells in G1 phase in order to avoid recording variance that is due to different cell  
104 types or cell-cycle phases. The Quartz-Seq sequencing protocol captures every poly-A RNA present  
105 in the cell at one specific moment, allowing to assess transcriptional noise. Following Shalek et al  
106 (2014) we first filtered out genes that were not appreciably expressed in order to reduce the  
107 contribution of technical noise to the total noise. For each gene we further calculated the mean  $\mu$  in  
108 FPKM units and variance  $\sigma^2$  in FPKM<sup>2</sup> units, as well as two previously published measures of  
109 stochasticity: the *Fano factor*, usually referred to as the bursty parameter, defined as  $\sigma^2/\mu$  and  
110 *Noise*, defined as the coefficient of variation squared ( $\sigma^2/\mu^2$ ). Both the variance and *Fano factor*  
111 are monotonically increasing functions of the mean (**Figure 2A**). *Noise* is inversely proportional to  
112 mean expression (**Figure 2A**), in agreement with previous observations at the protein level (Bar-  
113 even et al. 2006; Taniguchi et al. 2011). While this negative correlation was theoretically predicted  
114 (Tao et al. 2007), it may confound the analyses of transcriptional noise at the genome level, because  
115 mean gene expression is under specific selective pressure (Pál et al. 2001). In order to disentangle  
116 these effects, we developed a new quantitative measure of noise, independent of the mean  
117 expression level of each gene. To achieve this we fitted a linear model in the log-space plot of  
118 variance *versus* mean and extracted the slope (a) and intercept (b) of the regression line. We defined  
119  $F^*$  as  $\sigma^2/(a \cdot \mu^b)$  (see Material and Methods) that is, the ratio of the observed variance over the  
120 variance component predicted by the mean expression level. Genes with  $F^* < 1$  have a variance  
121 lower than expected according to their mean expression whereas genes with  $F^* > 1$  behave the  
122 opposite way (**Figure 2A**). This approach is similar in principle to the running median approach of  
123 Newmann et. al (Newman et al. 2006). As expected,  $F^*$  displays no significant correlation with the  
124 mean (Kendall's tau = -0.009, p-value = 0.106, **Figure 2B**). We therefore use  $F^*$  as a measure of  
125 SGE throughout this study.

## 126 **Stochastic gene expression correlates with the three-dimensional, but** 127 **not one-dimensional, structure of the genome**

128 We first sought to investigate whether genome organization significantly impacts the patterns of  
129 stochastic gene expression. We assessed whether genes in proximity along chromosomes display  
130 more similar amount of transcriptional noise than distant genes. We tested this hypothesis by  
131 computing the primary distance on the genome between each pair of genes, that is, the number of  
132 base pairs separating them on the chromosome, as well as the relative difference in their  
133 transcriptional noise (see Methods). We found no significant association between the two distances  
134 (Mantel tests, each chromosome tested independently). Contiguous genes in one dimension,  
135 however, have significantly more similar transcriptional noise than non-contiguous genes  
136 (permutation test,  $p$ -value  $< 1e-3$ , **Figure S1**). Using Hi-C data from mouse embryonic cells (Dixon  
137 et al. 2012), we report that genes in contact in three-dimensions have significantly more similar  
138 transcriptional noise than genes not in contact (permutation test,  $p$ -value  $< 1e-3$ , **Figure S1**). Most  
139 contiguous genes in one-dimension also appear to be close in three-dimensions and the effect of 3D  
140 contact is stronger than that of 1D contact. These results therefore suggest that the three-  
141 dimensional structure of the genome has a stronger impact on stochastic gene expression than the  
142 position of the genes along the chromosomes. We further note that while highly significant, the size  
143 of this effect is small, with a difference in relative expression of -1.12% (**Figure S1**).

## 144 **Transcription factors binding and histone methylation impact** 145 **stochastic gene expression**

146 The binding of transcription factors (TF) to promoter constitutes one notable source of  
147 transcriptional noise (**Figure 1**) (Blake et al. 2003; Newman et al. 2006). In eukaryotes, the  
148 accessibility of promoters is determined by the chromatin state, which is itself controlled by histone  
149 methylation. We assessed the extent to which transcriptional noise is linked to particular TFs and  
150 histone marks by using data from the Ensembl regulatory build (Zerbino et al. 2015), which  
151 provides data from experimental evidence of TF binding and methylation sites along the genome.  
152 First we contrasted the  $F^*$  values of genes with binding evidence for each annotated TF  
153 independently. Among 13 TF represented by at least 5 genes in our data set, we found that 4 of  
154 them significantly influence  $F^*$  after adjusting for a global false discovery rate of 5%: the  
155 transcription repressor CTCF (adjusted  $p$ -value = 0.0286), the transcription factor CP2-like 1  
156 (Tcfcp2l1, adjusted  $p$ -value = 0.0111), the X-Linked Zinc Finger Protein (Zfx, adjusted  $p$ -value =  
157 0.0111) and the Myc transcription factor (MYC, adjusted  $p$ -value = 0.0111). Interestingly,  
158 association with each of these four TFs led to an increase in transcriptional noise. We also report a

159 weak but significant positive correlation between the number of transcription factors associated  
160 with each gene and the amount of transcriptional noise (Kendall's tau = 0.023, p-value = 0.0009).  
161 This observation is consistent with the idea that noise generated by each TF is cumulative (Sharon et  
162 al. 2014). We then tested if particular histone marks are associated with transcriptional noise.  
163 Among five histone marks represented in our data set, three were found to be highly significantly  
164 associated to a higher transcriptional noise: H3K4me3 (adjusted p-value = 3.032e-162), H3K4me2  
165 (adjusted p-value = 1.01e-129) and H3K27me3 (adjusted p-value = 7.418e-33). Methylation on the  
166 fourth Lysine of histone H3 is associated with gene activation in humans, while tri-methylation on  
167 lysine 27 is usually associated with gene repression (Barski et al. 2007). These results suggest that  
168 both gene activation and silencing contribute to the stochasticity of gene expression, in agreement  
169 with the view that bursty transcription leads to increased noise (Blake et al. 2003; Newman et al.  
170 2006).

### 171 **Low noise genes are enriched for housekeeping functions**

172 We investigated the function of genes at both ends of the F\* spectrum. We defined as candidate  
173 gene sets the top 10% least noisy or the top 10% most noisy genes in our data set, and tested for  
174 enrichment of GO terms and Reactome pathways (see Methods). It is expected that genes encoding  
175 proteins participating in housekeeping pathways are less noisy because fluctuations in concentration  
176 of their products might have stronger deleterious effects (Pedraza and van Oudenaarden 2005). On  
177 the other hand, stochastic gene expression could be selectively advantageous for genes involved in  
178 immune and stress response, as part of a bet-hedging strategy (eg Arkin et al. 1998; Shalek et al.  
179 2013). While we do not find any significantly enriched Reactome pathway in the high noise gene  
180 set, a total of 37 pathways were significantly over-represented in the low-noise gene set (false  
181 discovery rate set to 1%). Interestingly, the top most significant pathways belong to modules related  
182 to translation (initiation, elongation, termination as well as ribosomal assembly), as well as several  
183 modules relating to gene expression, including chromatin regulation and mRNA splicing (**Figure**  
184 **3**). GO terms enrichment tests lead to similar results (**Table 1**): we found the molecular functions  
185 “nucleic acid binding” and “structural constituent of ribosome”, the biological processes  
186 “nucleosome assembly”, “innate immune response in mucosa” and “translation”, as well as the  
187 cellular component “nuclear nucleosome” to be enriched in the low noise gene set. All these terms  
188 but one relate to gene expression.

189 The lack of significantly enriched Reactome pathways by high noise genes can potentially be  
190 explained by the nature of the data set: as the original experiment was based on unstimulated cells,  
191 genes that directly benefit from high SGE might not be expressed in these experimental conditions.  
192 In accordance, high-noise genes are not found to be enriched for any GO term.



## 193 **Highly connected proteins are synthesized by low-noise genes**

194 The structure of the interaction network of proteins inside the cell can greatly impact the  
195 evolutionary dynamics of genes (Jeong et al. 2000; Barabási and Oltvai 2004). Furthermore, the  
196 contribution of each constitutive node within a given network varies. This asymmetry is largely  
197 reflected in the power-law-like degree distribution that is observed in virtually all biological  
198 networks (Barabási and Albert 1999) with a few genes displaying a lot of connections and a  
199 majority of genes displaying only a few. The individual characteristics of each node in a network  
200 can be characterized by various measures of centrality (Newmann 2003). Following previous  
201 studies on protein evolutionary rate (Fraser et al. 2002; Hahn et al. 2004; Jovelin and Phillips 2009)  
202 we asked whether, at the gene level, there is a link between centrality of a protein and the amount of  
203 transcriptional noise as measured by  $F^*$ , using five centrality metrics measured from the pathway  
204 data available in the Reactome database (Croft et al. 2014). Our data set encompasses 13,660 genes  
205 for which both gene expression data and pathway annotations were available.

206 We first estimated the pleiotropy index of each gene by counting how many different pathways the  
207 corresponding proteins are involved in. We then computed centrality measures as averages over all  
208 pathways in which each gene is involved. These measures include (1) *node degree* (here simply  
209 referred to as “degree”), which corresponds to the number of other nodes a given node is directly  
210 connected with, (2) *hub score*, which estimates the extent to which a node links to other central  
211 nodes, (3) *authority score*, which estimates the importance of a node by assessing how many hubs  
212 link to it, (4) *closeness*, a measure of the topological distance between a node and every other  
213 reachable node (the fewer edge hops it takes for a protein to reach every other protein in a network,  
214 the higher its closeness), and (5) *betweenness*, a measure of the frequency with which a protein  
215 belongs to the shortest path between every pair of nodes.

216 A principal component analysis (PCA) revealed that these measures essentially fall in two groups  
217 (**Figure S2**). The first component explained 43.4% of the total inertia, and represents measures  
218 relating to the number of interacting partners of a given protein (degree 31.9%, hub score 32.8%,  
219 authority score 33.6%). The second component, explaining 17.5% of the total inertia, represents the  
220 other three variables (pleiotropy 41.3%, betweenness 15.7%, closeness 40.6%). The third axis  
221 (17.2% of total inertia) represents only two variables (betweenness, 59.3% and closeness 38.4%),  
222 while the fourth axis (15.3% of total inertia) represents in majority pleiotropy (54.8%).

223 Measures contributing to the first component of the PCA are all significantly negatively correlated  
224 with transcriptional noise: the more central a protein is, the less transcriptional noise it displays  
225 (**Table 2**). We also observed that pleiotropy is negatively correlated with  $F^*$  (**Table 2**), although to  
226 a lesser extent suggesting that a protein that potentially performs multiple functions at the same



227 time needs to be less noisy. This effect is not an artifact of the fact that pleiotropic genes are  
228 themselves more central (e.g. correlation of pleiotropy and node degree: Kendall's tau = 0.229, p-  
229 value < 2.2e-16) or evolve more slowly (correlation of pleiotropy and Ka / Ks ratio: Kendall's tau =  
230 -0.11, p-value < 2.2e-16) since it is still significant after controlling for these variables (partial  
231 correlation of pleiotropy and F\*, accounting for centrality measures and Ka / Ks: Kendall's tau =  
232 -0.036, p-value = 3.695e-10). Closeness and betweenness, on the other hand, are highly correlated  
233 with each other but are independent of the degree measures (**Figure S2**), and do not significantly  
234 correlate with F\* (**Table 2**). In modular networks (Hartwell et al. 1999) nodes that connect different  
235 modules are extremely important to the cell (Guimera and Amaral 2005) and show high  
236 betweenness scores. In yeast, high betweenness proteins tend to be older and more essential (Joy et  
237 al. 2005), an observation also supported by our data set (betweenness vs gene age, Kendall's tau =  
238 0.077, p-value = 7.569e-10; betweenness vs Ka/Ks, Kendall's tau = -0.077, p-value = 7.818e-12). It  
239 has been argued, however, that in protein-protein interaction networks high betweenness proteins  
240 are less essential due to the lack of directed information flow, compared to, for instance, regulatory  
241 networks (Yu et al. 2007), a hypothesis which could explain the lack of observed correlation.  
242 It was previously shown that centrality measures negatively correlates with evolutionary rate (Hahn  
243 and Kern 2004). Our results suggest that central genes are selectively constrained for their  
244 transcriptional noise, and that centrality therefore also influences the regulation of gene expression.  
245 Interestingly, it has been reported that central genes tend to be more duplicated (Vitkup et al. 2006).  
246 The authors proposed that such duplication events would have been favored as they would confer  
247 greater robustness to deleterious mutations in proteins. Our results are compatible with another, non  
248 exclusive, possible advantage: having more gene copies could reduce transcriptional noise by  
249 averaging the amount of transcripts produced by each gene copy (Raser and O'Shea 2005).

## 250 **Network structure impacts transcriptional noise of constitutive genes**

251 Whereas estimators of node centrality highlight gene-specific properties inside a given network,  
252 measures at the whole-network level enable the comparison of networks with distinct properties.  
253 We computed the size, diameter and transitivity for each annotated network in our data set (1,364  
254 networks, Supplementary Material), as well as average measures of node scores (degree, hub score,  
255 authority score, closeness, betweenness) which we compare with the average F\* measure of all  
256 constitutive nodes. The size of a network is defined as its total number of nodes, while diameter is  
257 the length of the shortest path between the two most distant nodes. Transitivity is a measure of  
258 connectivity, defined as the average of all nodes' clustering coefficients, defined for each node as  
259 the proportion of its neighbors that also connect to each other. Interestingly, while network size is  
260 positively correlated with average degree and transitivity (Kendall's tau = 0.372, p-value < 2.2e-16

261 and Kendall's tau = 0.119, p-value = 2.807, respectively), diameter displays a positive correlation  
262 with average degree (Kendall's tau = 0.202, p-value < 2.2e-16) but a negative correlation with  
263 transitivity (Kendall's tau = -0.115, p-value = 2.237e-08). This is because diameter increases  
264 logarithmically with size, that is, addition of new nodes to large networks do not increase the  
265 diameter as much as additions to small networks. This suggests that larger networks are relatively  
266 more compact than smaller ones, and their constitutive nodes are therefore more connected. We find  
267 that average transcriptional noise correlates negatively with network size (Kendall's tau = -0.0594,  
268 p-value = 0.001376), while being independent of the diameter (Kendall's tau = 0.0125, p-value =  
269 0.5366). Transcriptional noise is also strongly negatively correlated with all averaged centrality  
270 measures (**Table 3**). These results are in line with the node-based analyses, and show that the more  
271 connections a network has, the less stochastic the expression of the underlying genes is. This  
272 supports the view of Raser and Oshea (Raser and O'Shea 2005) that the gene-extrinsic, pathway-  
273 intrinsic level is functionally pertinent and needs to be distinguished from the globally extrinsic  
274 level.

275 We further asked whether genes with similar transcriptional noise tend to synthesize proteins that  
276 connect to each other (positive assortativity) in a given network, or on the contrary, tend to avoid  
277 each other (negative assortativity). We considered all Reactome pathways annotated to the mouse  
278 and estimated their respective  $F^*$  assortativity. We found the mean assortativity to be significantly  
279 negative, with a value of -0.131 (one sample Wilcoxon rank test, p-value < 2.2e-16), meaning that  
280 proteins with different  $F^*$  values tend to connect with each other (**Figure S3**). Maslov & Sneppen  
281 (Maslov and Sneppen 2002) reported a negative assortativity between hubs in protein-protein  
282 interaction networks, which they hypothesized to be the result of selection for reduced vulnerability  
283 to deleterious perturbations. In our data set, however, we find the assortativity of hub scores to be  
284 slightly but significantly positive (average of 0.060, one sample Wilcoxon rank test, p-value =  
285 0.0002702, **Figure S3**), although with a large distribution of assortativity values. As we showed  
286 that hub scores correlates negatively with  $F^*$  (**Table 2**), we asked whether the negative assortativity  
287 of hub proteins can at least partly explain the negative assortativity of  $F^*$ . We found a significantly  
288 positive correlation between the two assortativity measures (Kendall's tau = 0.338, p-value < 2.2e-  
289 16). The relationship between the measures, however, is not linear. A Multivariate Adaptive  
290 Regression Spline was fitted to the two assortativity measures and resulted in a selected model with  
291 a strong positive correlation for hub score assortativity below -0.16, and virtually no correlation  
292 above (**Figure S3**), suggesting a distinct relationship between hub score and  $F^*$  for negative and  
293 positive hub score assortativity. Negative assortativity of hub proteins contributes to a negative  
294 assortativity of SGE (Kendall's tau = 0.381, p-value < 2.2e-16), while for pathways with positive  
295 hub score assortativity the effect disappears (Kendall's tau = 0.052, p-value = 0.06282). While

296 assortativity of  $F^*$  is closer to 0 for pathways with positive assortativity of hub score, we note that it  
297 is still significantly negative (average = -0.047, one sample Wilcoxon test with p-value < 2.2e-16).  
298 This suggests the existence of additional constraints that act on the distribution of noisy proteins in  
299 a network.

## 300 **Transcriptional noise is positively correlated with the evolutionary** 301 **rate of proteins**

302 In the yeast *Saccharomyces cerevisiae*, evolutionary divergence between orthologous coding  
303 sequences correlates negatively with fitness effect on knock-out strains of the corresponding genes  
304 (Hirsh and Fraser 2001), demonstrating that protein functional importance is reflected in the  
305 strength of purifying selection acting on it. Fraser et al (Fraser et al. 2004) studied transcription and  
306 translation rates of yeast genes and classified genes in distinct noise categories according to their  
307 expression strategies. They reported that genes with high fitness effect display lower expression  
308 noise than the rest. Following these pioneering observations, we hypothesized that genes under  
309 strong purifying selection at the protein sequence level should also be highly constrained for their  
310 expression and therefore display a lower transcriptional noise. To test this hypothesis, we correlated  
311  $F^*$  with the ratio of non-synonymous ( $K_a$ ) to synonymous substitutions ( $K_s$ ), as measured by  
312 sequence comparison between mouse genes and their human orthologs, after discarding genes with  
313 evidence for positive selection ( $n = 5$ ). In agreement with our prediction, we report a significantly  
314 positive correlation between the  $K_a / K_s$  ratio and  $F^*$  (**Figure 4**, Kendall's tau = 0.0619, p-value <  
315 2.2e-16), that is, highly constrained genes display less transcriptional noise than fast evolving ones.  
316 This result demonstrates that genes encoding proteins under strong purifying selection are also more  
317 constrained on their transcriptional noise.

## 318 **Older genes are less noisy**

319 Evolution of new genes was long thought to occur via duplication and modification of existing  
320 genetic material (“evolutionary tinkering”, (Jacob 1977)). Evidence for *de novo* gene emergence is  
321 however becoming more and more common (Tautz and Domazet-Lošo 2011; Xie et al. 2012). *De*  
322 *nov*o created genes undergo several optimization steps, including their integration into a regulatory  
323 network (Neme and Tautz 2013). We tested whether the historical process of incorporation of new  
324 genes into pathways impacts the evolution of transcriptional noise. We used the phylostratigraphic  
325 approach of Neme & Tautz (Neme and Tautz 2013), which categorizes genes into 20 strata, to  
326 compute gene age and tested for a correlation with  $F^*$ . As older genes tend to be more conserved  
327 (Wolf et al. 2009), more central (according to the preferential attachment model of network growth

328 (Jeong et al. 2000; Jeong et al. 2001)) and more pleiotropic, we controlled for these confounding  
329 factors (**Figure 4**, Kendall's tau = -0.041, p-value = 1.406e-15 ; partial correlation controlling for  
330 Ka / Ks ratio, centrality measures and pleiotropy level). These results suggest that older genes are  
331 more deterministically expressed while younger genes are more noisy. While we cannot rule out  
332 that functional constraints not fully accounted for by the Ka / Ks ratio or unavailable functional  
333 annotations could explain at least partially the correlation of gene age and transcriptional noise, we  
334 hypothesise that the observed correlation result from ancient genes having acquired more complex  
335 regulation schemes through time. Such schemes include for instance negative feedback loops,  
336 which have been shown to stabilize gene expression and reduce expression noise (Becskei and  
337 Serrano 2000; Thattai and Oudenaarden 2001).

## 338 **Position in the protein network is the main driver of transcriptional** 339 **noise**

340 In order to jointly assess the effect of network topology, epigenomic factors, Ka / Ks ratio and gene  
341 age, we modeled the patterns of transcriptional noise as a function of multiple predictive factors  
342 within the linear model framework. In order to avoid overfitting due to a large number of  
343 explanatory variables, and because some of these variables are intrinsically correlated and can lead  
344 to colinearity issues, we performed data reduction procedures prior to modeling. For network  
345 variables, we used as synthetic measures of node centrality the first four principal components of  
346 the principal component analysis (PCA), explaining together 93% of the total inertia (**Figure S2**).  
347 As transcription factors and histone marks data are binary (presence / absence for each gene), we  
348 performed a logistic PCA for both type of variables (Landgraf and Lee 2015). For transcription  
349 factors, we selected the three first components, which explained 78% of deviance (**Figure S3**). The  
350 loads on the first component (PC1) are all negative, meaning that PC1 captures a global correlation  
351 trend and does not discriminate between TFs. The second component PC2 is dominated by TCFC  
352 (positive loading) and Oct4 (negative loading), while the third component PC3 is dominated by  
353 Esrrb (positive loading) and MYC, nMyc and E2F1 (negative loadings). For histone marks, the two  
354 first components explained 95% of variance and were therefore retained (**Figure S4**). PC1 is  
355 dominated by marks H3K27me3 and H3K9me3 linked to gene repression (negative loadings) and  
356 PC2 by marks H3K4me1 and H3K4me3 linked to gene activation (positive loadings).  
357 We fitted a linear model with  $F^*$  as a response variable, Ka / Ks ratio, gene age, the four synthetic  
358 network centrality measures, the three synthetic variables capturing the transcription factor binding  
359 evidences and the two synthetic variables capturing the presence of histone marks as explanatory  
360 variables. We also included the mean gene expression in order to account for spurious correlation of  
361  $F^*$  with mean expression. We find that despite the intrinsic accounting of  $F^*$  for mean expression,

362 there is still a significant positive correlation with mean gene expression, which was not detected by  
363 Kendall's rank correlation test (see above). The corresponding coefficient, however, is very low  
364 (0.0003, **Table 4**). In agreement with our single variable analyses, we report that Ka / Ks ratio and  
365 gene age are significantly positively and negatively correlated with transcriptional noise,  
366 respectively (**Table 4**). We further find that the first component of the network PCA analysis has a  
367 significant positive effect on F\*. This measure essentially captures the effect of node degree, hub  
368 and transitivity scores (**Figure S2**); this result is therefore also consistent with single variable  
369 analyses. The second component of the logistic PCA of transcription factor binding evidence, as  
370 well as the first component of the logistic PCA on histone marks are also found to be significant  
371 (**Table 4**), which confirms the effect of these variables when other factors are accounted for. The  
372 coefficient associated with transcription factor PC2 is positive, which indicates that TFs increase  
373 transcriptional noise, in particular TCFC which has the highest loading on PC2. The coefficient  
374 associated with histone marks PC1, however is negative. Yet the largest loadings of the variables on  
375 this component are negative (H3K27me3 and H3K9me3), implying that these histones marks are  
376 associated with a higher transcriptional noise, as found by individual tests.

377 Altogether, the linear model with all variables explained 3.93% of the total variance. This small  
378 value indicates either that gene idiosyncrasies largely predominate over general effects, or that our  
379 estimates of transcriptional noise have a large measurement error, or both. An analysis of variance  
380 shows that the centrality variable explains the largest part of the variance (1.66% variance explained  
381 for the first synthetic variable, Fisher's test p-value = 9.552e-15 and 0.11% for the second synthetic  
382 variable, p-value = 0.0410). Mean gene expression only explained 0.11% of the total variance  
383 (Fisher's test p-value = 0.0386). Gene age only explains 0.31% of the variance (Fisher's test p-  
384 value = 1.432e-09) and functional constraints 1% (Ka / Ks variable, Fisher's test p-value = 0.0007).  
385 Transcription factors explain 0.19% of variance (Fisher's test p-value = 0.0079) and histone marks  
386 0.48% (Fisher's test p-value = 2.665e-5). This suggests that, among all factors tested, position in  
387 protein network is the main driver of the evolution of gene-specific stochastic expression.

388 We further included the effect of three-dimensional organization of the genome in order to assess  
389 whether it could be a confounding factor. We developed a correlation model allowing for genes in  
390 contact to have correlated values of transcriptional noise. The correlation model was fitted together  
391 with the previous linear model in the generalized least square (GLS) framework. This model allows  
392 for one additional parameter,  $\lambda$ , which captures the strength of correlation due to three-dimensional  
393 organization of the genome (see Methods). The estimate of  $\lambda$  was found to be 0.0036, which means  
394 that the spatial autocorrelation of transcriptional noise is low on average. This estimate is  
395 significantly higher than zero, and model comparison using Akaike's information criterion favors  
396 the linear model with three-dimensional correlation, yet with very low support (AIC = 6403.452 vs.



397 AIC = 6403.859 for a linear model without three-dimensional correlation). Consistently, accounting  
398 for this correlation does not change significantly our estimates (**Table 4**), confirming network  
399 centrality measures as the main factor explaining the distribution of transcriptional noise.

## 400 **Analysis of bone marrow-derived dendritic cells supports the** 401 **generality of the results**

402 We assessed the reproducibility of our results by analyzing an additional single-cell transcriptomics  
403 data set of 95 unstimulated bone marrow-derived dendritic cells (BMDC) (Shalek et al. 2014). After  
404 filtering (see Methods), the data set consisted of 11,640 genes. Using the same normalization  
405 procedure as for the Sasagawa data set, we nonetheless report a weak but significant negative  
406 correlation between  $F^*$  and the mean expression (-0.068, p-value < 2.2e-16). We fitted a  
407 generalized linear model as for the embryonic stem cell (ESC) data set, with the exception that no  
408 epigenomic data was available for this cell type. Results of this model are very similar to the ones  
409 with the ESC data set: the model explains 3.24% of the variance, with 1.42% explained by network  
410 measures, and all effects are similar in direction and intensity (**Table S1**). When taking 3D genome  
411 correlations into account, we estimated a low correlation coefficient as for the ESC dataset ( $\lambda$   
412 = 0.0025), and the AIC favored the model without correlation. The mean gene expression is not  
413 found to be significant when taken together with other parameters in the BMDC data set.  
414 Interestingly, we find that the second and fourth principal components of the network analysis are  
415 also significant with this data set. We note that values of the “closeness” variable, which are for this  
416 dataset positively correlated with “betweenness” values, while they are negatively correlated for the  
417 ESC dataset. While these results support the generality of our observations, they also illustrate that  
418 in details, the structure of translational noise may vary in a cell type-specific manner.

## 419 **Biological, not technical noise is responsible for the observed patterns**

420 The variance in gene expression measured from single-cell transcriptomics is a combination of  
421 biological and technical variance. While the two sources of variance are a priori independent, gene-  
422 specific technical variance has been observed in micro-array experiments (Pozhitkov et al. 2007)  
423 making a correlation of the two types of variance plausible. If similar effects also affect RNA-Seq  
424 experiments, technical variance could be correlated to gene function and therefore act as a covariate  
425 in our analyses. In order to assess whether this is the case, we used the dataset of Shalek et al  
426 (Shalek et al. 2013), which contains both single-cell transcriptomics and 3 replicates of 10,000  
427 pooled-cell RNA sequencing. In traditional RNA sequencing, which is typically performed on  
428 pooled populations of several thousands of cells, biological variance is averaged out so that the

429 resulting measured variance between replicates is essentially the result of technical noise. We  
430 computed the mean and variance in expression of each gene across the three populations of cells.  
431 By plotting the variance versus the mean in log-space, we were able to compute a “technical”  $F^*$  (  
432  $F_t^*$ ) value for each gene (Methods). We fitted linear models with and without 3D genome  
433 correlation as for the single cell data, using  $F_t^*$  instead of  $F^*$ . We report that no variable but the  
434 mean gene expression had a significant effect on  $F_t^*$ , yet with a very low size effect (**Table S2**).  
435 In addition, there was no enrichment of the 10<sup>th</sup> and 90<sup>th</sup>  $F_t^*$  percentiles for any particular  
436 pathway or GO term. These results therefore support our conclusion that the correlations we  
437 observe are due to variations that are biological, not technical.

## 438 Discussion

439 Throughout this work, we provided the first genome-wide evolutionary and systemic study of  
440 transcriptional noise, using mouse cells as a model. We have shown that transcriptional noise  
441 correlates with functional constraints both at the level of the gene itself via the protein it encodes,  
442 but also at the level of the pathway(s) the gene belongs to. We further discuss here potential  
443 confounding factors in our analyses and argue that our results are compatible with selection acting  
444 to reduce noise-propagation at the network level.

445 In this study, we exhibited several factors explaining the variation in transcriptional noise between  
446 genes. While highly significant, the effects we report are of small size, and a complex model  
447 accounting for all tested sources of variation only explains a few percent of the total observed  
448 variance. There are several possible explanations for this reduced explanatory power: (1)  
449 transcriptional noise is a proxy for noise in gene expression, at which selection occurs (**Figure 1**).  
450 As transcriptional noise is not randomly distributed across the genome, it must constitute a  
451 significant component of expression noise, in agreement with previous observations (Blake et al.  
452 2003; Newman et al. 2006). Translational noise, however, might constitute an important part of the  
453 expression noise and was not assessed in this study. (2) Gene expression levels were assessed on  
454 embryonic stem cells in culture. Such an experimental system may result in gene expression that  
455 differs from that in natural conditions under which natural selection acted. (3) Functional  
456 annotations, in particular pathways and gene interactions are incomplete, and network-based  
457 measures have most likely large false positive and negative error rates. (4) While the newly  
458 introduced  $F^*$  measure allowed us to assess the distribution of transcriptional noise independently  
459 of the average mean expression – therefore constituting an improvement over previous studies – it  
460 does not capture the full complexity of SGE. Explicit modeling, for instance based in the Beta-



461 Poisson model (Vu et al. 2016) is a promising avenue for the development of more sophisticated  
462 quantitative measures.

463 In a pioneering study, Fraser et al, followed by Shalek et al, demonstrated that essential genes  
464 whose deletion is deleterious, and genes encoding subunits of molecular complexes (Fraser et al.  
465 2004) as well as housekeeping genes (Shalek et al. 2013) display reduced gene expression noise.  
466 Our findings go beyond these early observations by providing a statistical assessment of the joint  
467 effect of multiple explanatory factors. Our analyses reveal that network centrality measures are the  
468 explanatory factors that explained the most significant part of the distribution of transcriptional  
469 noise in the genome. This suggests that selection at the pathway level is a widespread phenomenon  
470 that drives the evolution of SGE at the gene level. This multi-level selection mechanism, we  
471 propose, can be explained by selection against noise propagation within networks. It has been  
472 experimentally demonstrated that expression noise can be transmitted from one gene to another  
473 gene with which it is interacting (Pedraza and van Oudenaarden 2005). Large noise at the network  
474 level is deleterious (Barkai and Leibler 1999) but each gene does not contribute equally to it, thus  
475 the strength of selective pressure against noise varies among genes in a given network. We have  
476 shown that highly connected, “central” proteins typically display reduced transcriptional noise.  
477 Such nodes are likely to constitute key players in the flow of noise in intra-cellular networks as they  
478 are more likely to transmit noise to other components. In accordance with this hypothesis, we find  
479 genes with the lowest amount of transcriptional noise to be enriched for top-level functions, in  
480 particular involved in the regulation of other genes.

481 These results have several implications for the evolution of gene networks. First, this means that  
482 new connections in a network can potentially be deleterious if they link genes with highly stochastic  
483 expression. Second, distinct selective pressures at the “regulome” and “interactome” levels (**Figure**  
484 **1**) might act in opposite direction. We expect genes encoding highly connected proteins to have  
485 more complex regulation schemes, in particular if their proteins are involved in several biological  
486 pathways. In accordance, several studies demonstrated that expression noise of a gene positively  
487 correlates with the number of transcription factors controlling its regulation (Sharon et al. 2014), a  
488 correlation that we also find significant in the data set analysed in this work. Central genes, while  
489 being under negative selection against stochastic behavior, are then more likely to be controlled by  
490 numerous transcription factors which increase transcriptional noise. As a consequence, if the  
491 number of connections at the interactome level is correlated with the number of connections at the  
492 regulome level, we predict the existence of a trade-off in the number of connections a gene can  
493 make in a network. Alternatively, highly connected genes might evolve regulatory mechanisms  
494 allowing them to uncouple these two levels: negative feedback loops, for instance, where the

495 product of a gene down-regulates its own production have been shown to stabilize expression and  
496 significantly reduce stochasticity (Beckstein and Serrano 2000; Dublanche et al. 2006; Tao et al.  
497 2007). We therefore predict that negative feedback loops are more likely to occur at genes that are  
498 more central in protein networks, as they will confer greater resilience against high SGE, which is  
499 advantageous for this class of genes.

500 Our results enabled the identification of possible selective pressures acting on the level of  
501 stochasticity in gene expression. The mechanisms by which the amount of stochasticity can be  
502 controlled remain however to be elucidated. We evoked the existence of negative feedback loops  
503 which reduce stochasticity and the multiplicity of upstream regulator which increase it. Recent work  
504 by Wolf et al (Wolf et al. 2015) and Metzger et al (Metzger et al. 2015) add further perspective to  
505 this scheme. Wolf and colleagues found that in *Escherichia coli* noise is higher for natural than  
506 experimentally evolved promoters selected for their mean expression level. They hypothesized that  
507 higher noise is selectively advantageous in case of changing environments. On the other hand,  
508 Metzger and colleagues performed mutagenesis experiments and found signature of selection for  
509 reduced noise in natural populations of *Saccharomyces cerevisiae*. These seemingly opposing results  
510 combined with our observations provide additional evidence that the amount of stochasticity in the  
511 expression of single genes has an optimum, as high values are deleterious because of noise  
512 propagation in the network, whilst lower values, which result in reduced phenotypic plasticity, are  
513 suboptimal in case of changing environment.

## 514 **Conclusion**

515 Using a new measure of transcriptional noise, our results demonstrate that the position of the  
516 protein in the interactome is a major driver of selection against stochastic gene expression. As such,  
517 transcriptional noise is an essential component of the phenotype, in addition to the mean expression  
518 level and the actual sequence and structure of the encoded proteins. This is currently an under-  
519 appreciated phenomenon, and gene expression studies that focus only on the mean expression of  
520 genes may be missing key information about expression diversity. The study of gene expression  
521 must consider changes in noise in addition to change in mean expression level as a putative  
522 explanation for adaptation. Further work aiming to unravel the exact structure of the regulome is  
523 however needed in order to fully understand how transcriptional noise is generated or inhibited.

## 524 **Material and Methods**

### 525 **Single-cell gene expression data set**

526 We used the dataset generated by Sasagawa et al. (Sasagawa et al. 2013) retrieved from the Gene  
527 Expression Omnibus repository (accession number GSE42268). We analyzed expression data  
528 corresponding to embryonic stem cells in G1 phase, for which more individual cells were  
529 sequenced. A total of 17,063 genes had non-zero expression in at least one of the 20 single cells.  
530 Similar to Shalek et al (Shalek et al. 2014), a filtering procedure was performed where only genes  
531 whose expression level satisfied  $\log(\text{FPKM}+1) > 1.5$  in at least one single cell were kept for further  
532 analyses. This filtering step resulted in a total of 13,660 appreciably expressed genes for which  
533 transcriptional noise was evaluated.

### 534 **Measure of transcriptional noise**

535 The expression mean ( $\mu$ ) and variance ( $\sigma^2$ ) of each gene over all single cells were  
536 computed. A linear model was fitted on the log-transformed means and variances in order to  
537 estimate the coefficients of the power law regression:

$$538 \quad \sigma^2 = a \cdot \mu^b \quad (\text{eqn 1})$$

$$539 \quad \log(\sigma^2) = \log(a) + b \cdot \log(\mu) \quad (\text{eqn 2})$$

540 We defined  $F^*$  as the ratio of the observed variance and the predicted variance:

$$541 \quad F^* = \frac{\sigma^2}{a \cdot \mu^b} \quad (\text{eqn 3})$$

542  $F^*$  can be seen as a general expression for the Fano factor ( $a = b = 1$ ) and noise measure ( $a = 1, b =$   
543  $2$ ).  $F^*$  is the stochasticity measure unit with which we produced our results, after estimating the  $a$   
544 and  $b$  parameters from the data.

### 545 **Genome architecture**

546 The mouse proteome from Ensembl (genome version: mm9) was used in order to get coordinates of  
547 all genes. The Hi-C dataset for embryonic stem cells (ES) from Dixon et al (Dixon et al. 2012) was  
548 used to get three-dimensional domain information. Two genes were considered in proximity in one  
549 dimension (1D) if they are on the same chromosome and no protein-coding gene was found  
550 between them. The primary distance (in number of nucleotides) between their midpoint coordinates  
551 was also recorded as 1D a distance measure between the genes. Two genes were considered in  
552 proximity in three dimensions (3D) if the normalized contact number between the two windows the  
553 genes belong was non-null. Two genes belonging to the same window were considered in

554 proximity. We further computed the relative difference of stochastic gene expression between two  
555 genes by computing the ratio  $(F_2^* - F_1^*) / (F_2^* + F_1^*)$ . For each chromosome, we independently tested  
556 if there was a correlation between the primary distance and the relative difference in stochastic gene  
557 expression with a Mantel test, as implemented in the *ade4* package (Dray and Dufour, 2007). In  
558 order to test whether genes in proximity (1D and 3D) had more similar transcriptional noise than  
559 distant genes, we contrasted the relative differences in transcription noise between pairs of genes in  
560 proximity and pairs of distant genes. As we test all pairs of genes, we performed a randomization  
561 procedure in order to assess the significance of the observed differences by permuting the rows and  
562 columns in the proximity matrices 1,000 times. Linear models accounting for spatial interactions  
563 with genes were fitted using the generalized least squares (GLS) procedure as implemented in the  
564 “nlme” package for R (Pinheiro et al 2016). A correlation matrix between all tested genes was  
565 defined as  $G = \{g_{i,j}\}$ , where  $g_{i,j}$  is the correlation between genes *i* and *j*. We defined  
566  $g_{i,j} = 1 - \exp(-\lambda \delta_{i,j})$ , where  $\delta_{i,j}$  takes 1 if genes *i* and *j* are in proximity, 0 otherwise.  
567 Parameter  $\lambda$  was estimated jointly with other model parameters, it measures the strength of the  
568 genome “spatial” correlation. Parameters were estimated using the maximum likelihood (ML)  
569 procedure, instead of the default restricted maximum likelihood (REML) in order to perform model  
570 comparison using Akaike’s information criterion (AIC).

## 571 **Transcription factors and histone marks**

572 Transcription factor (TF) mapping data from the Ensembl regulatory build (Zerbino et al. 2015)  
573 were obtained via the *biomaRt* package for R. We used the Grch37 build as it contained data for  
574 stem cells epigenomes. Genes were considered to be associated with a given TF when at least one  
575 binding evidence was present in the 3 kb upstream flanking region. Transcription factors associated  
576 with less than 5 genes for which transcriptional noise could be computed were not considered  
577 further. A similar mapping was performed for histone marks by counting the evidence of histone  
578 modification in the 3 kb upstream and downstream regions of each gene. A logistic principal  
579 component analysis was conducted on the resulting binary contingency tables using the *logisticPCA*  
580 package for R (Landgraf and Lee 2015), for TF and histone marks separately. Principal components  
581 were used to define synthetic variables for further analyses.

## 582 **Biological pathways and network topology**

583 The 13,660 Ensembl ids in our dataset were mapped to 13,136 Entrez ids. We kept only genes with  
584 unambiguous mapping, resulting in 11,032 Entrez ids for the Reactome pathway analysis. We  
585 defined genes either in the top 10% least noisy or in the top 10% most noisy as candidate sets and

586 used the Reactome PA package (Yu and He 2015) to search the mouse Reactome database for  
587 overrepresented pathways with a 1% false discovery rate.

588 Thirteen thousand six hundred and sixty Ensembl ids mapped to a total of 29,859 UniProt ids. For  
589 network analyses, we removed UniProt ids which were not annotated to the Reactome database,  
590 resulting in a total of 4,929 UniProt ids after this first step. We then removed genes that mapped  
591 ambiguously from Ensembl to UniProt, retaining 3,959 Ensembl / UniProt ids for which we  
592 computed centrality measures. At the network level, size, transitivity and diameter could be  
593 calculated for every pathway using a combination of three R packages (“pathview” (Luo 2013),  
594 “igraph” (Csardi 2015) and “graphite” (Sales et al 2016)). As the calculation of assortativity does  
595 not handle missing data (that is, nodes of the pathway for which no value could be computed), we  
596 computed assortativity on the sub-network with nodes for which data were available. A principal  
597 component analysis was conducted on all network centrality measures using the ade4 package for R  
598 (Dray and Dufour 2007). Models of  $F^*$  assortativity measures were fitted and compared using  
599 Multivariate Adaptive Regression Splines, as implemented in the “earth” package in R (Milborrow  
600 2016).

## 601 **Gene Ontology Enrichment**

602 Eight thousand three hundreds and twenty five out of the 13,660 genes were associated with Gene  
603 Ontology (GO) terms. We tested genes for GO terms enrichment at both ends of the  $F^*$  spectrum  
604 using the same threshold percentile of 10% low / high noise genes as we did for the Reactome  
605 analysis. We carried out GO enrichment analyses using two different algorithms: “Parent-child”  
606 (Grossmann et al. 2007) and “Weight01”, a mixture of two algorithms developed by Alexa et al  
607 (Alexa et al. 2006). We kept only the terms that appeared simultaneously on both Parent-child and  
608 Weight01 under 10% significance level, controlling for multiple testing using the FDR method  
609 (Benjamini and Hochberg 1995).

## 610 **Sequence divergence**

611 The Ensembl's Biomart interface was used to retrieve the proportion of non-synonymous ( $K_a$ ) and  
612 synonymous ( $K_s$ ) divergence estimates for each mouse gene relative to the human ortholog. This  
613 information was available for 13,136 genes.

## 614 **Gene Age**

615 The relative taxonomic ages of the mouse genes have been computed and is available in the form of  
616 20 Phylostrata (Neme and Tautz 2013). Each Phylostratum corresponds to a node in the  
617 phylogenetic tree of life. Phylostratum 1 corresponds to “All cellular organisms” whereas

618 Phylostratum 20 corresponds to “*Mus musculus*”, with other levels in between. We used this  
619 published information to assign each of our genes to a specific Phylostratum and used this as a  
620 relative measure of gene age: Age = 21 - Phylostratum, so that an age of 1 corresponds to genes  
621 specific to *M. musculus* and genes with an age of 20 are found in all cellular organisms.

## 622 **Linear modeling**

623 We simultaneously assessed the effect of different factors on transcriptional noise by fitting linear  
624 models to the gene-specific F\* estimates. To avoid colinearity issues of intrinsically correlated  
625 explanatory variables, we used a principal component regression approach, using principal  
626 components analysis to reduce the number of input variables. We built a linear model with F\* as a  
627 response variable and the four first components of network centrality measures, three first  
628 components of TF binding variables, two first components of histone marks variables, as well as the  
629 Ka / Ks ratio and gene age. As the fitted model displayed significant departure to normality, it was  
630 further transformed using the Box-Cox procedure (“boxcox” function from the MASS package for  
631 R (Venables and Ripley 2002)). Residues of the selected model had independent residue  
632 distributions (Ljung-Box test, p-value = 0.1008) but still displayed significant departure to  
633 normality (Shapiro-Wilk test, p-value = 1.751e-5), and heteroscedasticity (Harrison-McCabe test, p-  
634 value = 0.00067). In order to assess whether these departures from the Gauss-Markov assumptions  
635 could bias our results, we used two complementary approaches. First we used the “robcov” function  
636 of the “rms” package in order to get robust estimates of the effect significance (Harrel 2016).  
637 Second, we performed a quantile regression using the “rq” function (parameter tau set to 0.5,  
638 equivalent to a median regression) of the “quantreg” package for R (Koenker, 2016). As quantile  
639 regression results were systematically consistent with linear regression analyses, we only report  
640 results from the latter.

## 641 **Additional data sets**

642 The aforementioned analyses were additionally conducted on the data set of Shalek et al (Shalek et  
643 al. 2014). Following the filtering procedure established by the authors in the original paper, genes  
644 which did not satisfied the condition of being expressed by an amount such that  $\log(\text{TPM}+1) > 1$  in  
645 at least one of the 95 single cells were further discarded, where TPM stands for transcripts per  
646 million. This cut-off threshold resulted in 11,640 genes being kept for investigation. The rest of the  
647 analyses was conducted in the same way as in Sasagawa's data set.



## 648 **Data and program availability**

649 All datasets and scripts to reproduce the results of this study are available at Figshare, under the  
650 DOI 10.6084/m9.figshare.4587169.

651

## 652 **Authors contributions**

653 GVB and JYD designed the experiments and wrote the manuscript. GVB, NP and JYD conducted  
654 the analyses.

## 655 **Acknowledgements**

656 The authors would like to thank Rafiq Neme-Garrido, Frederic Bartels and Estelle Renaud for  
657 fruitful discussions about this work, Andrew Landgraf for help with the logistic PCA analysis as  
658 well as Diethard Tautz for comments on an earlier version of this manuscript. JYD acknowledges  
659 funding from the Max Planck Society. This work was supported by the German Research  
660 Foundation (DFG), within the priority program (SPP) 1590.

661

## 662 **References**

- Arkin A, Ross J, Mcadams HH. 1998. Stochastic Kinetic Analysis of Developmental Pathway Bifurcation in Phage L-Infected Escherichia coli Cells. *Genetics* 149:1633–1648.
- Barabási A-L, Albert R. 1999. Emergence of Scaling in Random Networks. *Science* 286:509–513.
- Barabási A-L, Oltvai ZN. 2004. Network biology: understanding the cell's functional organization. *Nature reviews. Genetics* 5:101–113.
- Bar-even A, Paulsson J, Maheshri N, Carmi M, Shea EO, Pilpel Y, Barkai N. 2006. Noise in protein expression scales with natural protein abundance. *Nature genetics* 38:636–643.
- Barkai N, Leibler S. 1999. Circadian clocks limited by noise. *Nature* 403:267–268.
- Barski A, Cuddapah S, Cui K, Roh T-Y, Schones DE, Wang Z, Wei G, Chepelev I, Zhao K. 2007. High-resolution profiling of histone methylations in the human genome. *Cell* 129:823–837.
- Becskei A, Kaufmann BB, van Oudenaarden A. 2005. Contributions of low molecule number and chromosomal positioning to stochastic gene expression. *Nature Genetics* 37:937–944.
- Becskei A, Serrano L. 2000. Engineering stability in gene networks by autoregulation. *Nature* 405:590–593.
- Blake WJ, Kærn M, Cantor CR, Collins JJ. 2003. Noise in eukaryotic gene expression. *Nature* 422:633–637.



- Chubb JR, Trcek T, Shenoy SM, Singer RH. 2006. Transcriptional Pulsing of a Developmental Gene. *Current Biology* 16:1018–1025.
- Dixon JR, Selvaraj S, Yue F, Kim A, Li Y, Shen Y, Hu M, Liu JS, Ren B. 2012. Topological domains in mammalian genomes identified by analysis of chromatin interactions. *Nature* 485:376–380.
- Dublanche Y, Michalodimitrakis K, Kümmerer N, Foglierini M, Serrano L. 2006. Noise in transcription negative feedback loops: simulation and experimental analysis. *Molecular systems biology* 2:41–41.
- Eldar A, Elowitz MB. 2010. Functional roles for noise in genetic circuits. *Nature* 467:167–173.
- Elowitz MB, Levine AJ, Siggia ED, Swain PS. 2002. Stochastic Gene Expression in a Single Cell. *Science* 297:1183–1186.
- Fraser HB, Hirsh AE, Giaever G, Kumm J, Eisen MB. 2004. Noise Minimization in Eukaryotic Gene Expression. *PLoS Biology* 2:0834–0838.
- Fraser HB, Hirsh AE, Steinmetz LM, Scharfe C, Feldman MW. 2002. Evolutionary Rate in the Protein Interaction Network. *Science* 296:750–752.
- Gillespie DT. 1977. Exact Simulation of Coupled Chemical Reactions. *The Journal of Physical Chemistry* 81:2340–2361.
- Guimera R, Amaral LAN. 2005. Functional cartography of complex metabolic networks. *Nature* 433:895–900.
- Hahn MW, Conant GC, Wagner A. 2004. Molecular Evolution in Large Genetic Networks: Does Connectivity Equal Constraint? *Journal of Molecular Evolution* 58:203–211.
- Hahn MW, Kern AD. 2004. Comparative Genomics of Centrality and Essentiality in Three Eukaryotic Protein-Interaction Networks. *Molecular Biology and Evolution* 22:7–10.
- Hartwell LH, Hopfield JJ, Leibler S, Murray AW. 1999. From molecular to modular cell biology. *Nature* 402:C47–C52.
- Hebenstreit D. 2013. Are gene loops the cause of transcriptional noise? *Trends in Genetics* 29:333–338.
- Hirsh A, Fraser H. 2001. Protein dispensability and rate of evolution. *Nature* 411:1046–1049.
- Jacob F. 1977. Evolution and Tinkering. *Science* 196:1161–1166.
- Jeong H, Mason SP, Barabási A L, Oltvai ZN. 2001. Lethality and centrality in protein networks. *Nature* 411:41–42.
- Jeong H, Tombor B, Albert R, Oltvai ZN, Barabási A-L. 2000. The large-scale organization of metabolic networks. *Nature* 407:651–654.
- Jovelin R, Phillips PC. 2009. Evolutionary rates and centrality in the yeast gene regulatory network. *Genome biology* 10:R35–R35.
- Joy MP, Brock A, Ingber DE, Huang S. 2005. High-betweenness proteins in the yeast protein interaction network. *Journal of Biomedicine and Biotechnology* 2005:96–103.

- Kaufmann BB, van Oudenaarden A. 2007. Stochastic gene expression: from single molecules to the proteome. *Current opinion in genetics & development* 17:107–112.
- Kepler TB, Elston TC. 2001. Stochasticity in Transcriptional Regulation : Origins, Consequences, and Mathematical Representations. *Biophysical Journal* 81:3116–3136.
- Kim PM, Lu LJ, Xia Y, Gerstein MB. 2013. Relating Three-Dimensional Structures to Protein Networks Provides Evolutionary Insights. *Science* 603:1938–1941.
- Landgraf AJ, Lee Y. 2015. Dimensionality Reduction for Binary Data through the Projection of Natural Parameters. arXiv:1510.06112 [stat] [Internet]. Available from: <http://arxiv.org/abs/1510.06112>
- Lehner B. 2008. Selection to minimise noise in living systems and its implications for the evolution of gene expression. *Molecular systems biology* 4:170–170.
- Maslov S, Sneppen K. 2002. Specificity and Stability in Topology of Protein Networks. *Science* 296:910–913.
- Mcadams HH, Arkin A. 1997. Stochastic mechanisms in gene expression. *Proceedings of the National Academy of Sciences of the United States of America* 94:814–819.
- Metzger BPH, Yuan DC, Gruber JD, Dubeau F, Wittkopp PJ. 2015. Selection on noise constrains variation in a eukaryotic promoter. *Nature* 521:344–347.
- Neme R, Tautz D. 2013. Phylogenetic patterns of emergence of new genes support a model of frequent de novo evolution. *BMC genomics* 14:117–117.
- Newman JRS, Ghaemmaghami S, Ihmels J, Breslow DK, Noble M, Derisi JL, Weissman JS. 2006. Single-cell proteomic analysis of *S. cerevisiae* reveals the architecture of biological noise. *Nature* 441:840–846.
- Norman TM, Lord ND, Paulsson J, Losick R. 2015. Stochastic Switching of Cell Fate in Microbes. *Annual review of microbiology* 69:381–403.
- Ozbudak EM, Thattai M, Kurtser I, Grossman AD, Oudenaarden AV. 2002. Regulation of noise in the expression of a single gene. *Nature genetics* 31:69–73.
- Pál C, Papp B, Hurst LD. 2001. Highly Expressed Genes in Yeast Evolve Slowly. *Genetics* 158:927–931.
- Pedraza JM, van Oudenaarden A. 2005. Noise propagation in gene networks. *Science* 307:1965–1969.
- Pombo A, Dillon N. 2015. Three-dimensional genome architecture: players and mechanisms. *Nature Reviews Molecular Cell Biology* 16:245–257.
- Pozhitkov, Alex E., Tautz D, Noble, Peter A. 2007. Oligonucleotide microarrays: widely applied, poorly understood. *BRIEFINGS IN FUNCTIONAL GENOMICS AND PROTEOMICS* 6:141–148.
- Raj A, Oudenaarden AV. 2008. Review *Nature*, Nurture, or Chance : Stochastic Gene Expression and Its Consequences. *Cell* 135:216–226.

- Raj A, Peskin CS, Tranchina D, Vargas DY, Tyagi S. 2006. Stochastic mRNA Synthesis in Mammalian Cells. *PLoS Biology* 4:e309–e309.
- Raser JM, O’Shea EK. 2005. Noise in Gene Expression: Origins, Consequences, and Control. *Science* 309.
- Sánchez A, Kondev J. 2008. Transcriptional control of noise in gene expression. *Proceedings of the National Academy of Sciences of the United States of America* 105:5081–5086.
- Sasagawa Y, Nikaido I, Hayashi T, Danno H, Uno KD, Imai T, Ueda HR. 2013. Quartz-Seq : a highly reproducible and sensitive single-cell RNA sequencing method , reveals non- genetic gene-expression heterogeneity. *Genome Biology* 14:R31–R31.
- Sauer U, Heineman M, Zamboni N. 2007. Getting Closer to the Whole Picture. *Science* 316:550–551.
- Shahrezaei V, Swain PS. 2008. The stochastic nature of biochemical networks. *Curr. Opin. Biotechnol.* 19:369–374.
- Shalek AK, Satija R, Adiconis X, Gertner RS, Gaublomme JT, Raychowdhury R, Schwartz S, Yosef N, Malboeuf C, Lu D, et al. 2013. Single-cell transcriptomics reveals bimodality in expression and splicing in immune cells. *Nature* 498:236–240.
- Shalek AK, Satija R, Shuga J, Trombetta JJ, Gennert D, Lu D, Chen P, Gertner RS, Gaublomme JT, Yosef N, et al. 2014. Single-cell RNA-seq reveals dynamic paracrine control of cellular variation. *Nature* 510:363–369.
- Sharon E, Van Dijk D, Kalma Y, Keren L, Manor O, Yakhini Z, Segal E. 2014. Probing the effect of promoters on noise in gene expression using thousands of designed sequences. *Genome Research* 24:1698–1706.
- So L, Ghosh A, Zong C, Sepúlveda LA, Segev R, Golding I. 2011. General properties of transcriptional time series in *Escherichia coli*. *Nature Genetics* 43:554–560.
- Spudich JL, Koshland DEJ. 1976. Non-genetic individuality: chance in the single cell. *Nature*:467–471.
- Suter DM, Molina N, Gatfield D, Schneider K, Schibler U, Naef F. 2011. Mammalian Genes Are Transcribed with Widely Different Bursting Kinetics. *Science* 332:472–474.
- Taniguchi Y, Choi PJ, Li G, Chen H, Babu M, Hearn J, Emili A, Xie XS. 2011. Quantifying *E. coli* Proteome and Transcriptome with Single-Molecule Sensitivity in Single Cells. *Science (New York, N.Y.)* 329:533–539.
- Tao Y, Zheng X, Sun Y. 2007. Effect of feedback regulation on stochastic gene expression. *J. Theor. Biol.* 247:827–836.
- Tautz D, Domazet-Lošo T. 2011. The evolutionary origin of orphan genes. *Nature reviews. Genetics* 12:692–702.
- Thattai M, Oudenaarden AV. 2001. Intrinsic noise in gene regulatory networks. *Proceedings of the National Academy of Sciences of the United States of America* 98:8614–8619.

- Thattai M, Oudenaarden AV. 2004. Stochastic Gene Expression in Fluctuating Environments. *Genetics* 167:523–530.
- Vitkup D, Kharchenko P, Wagner A. 2006. Influence of metabolic network structure and function on enzyme evolution. *Genome biology* 7:R39–R39.
- Vu TN, Wills QF, Kalari KR, Niu N, Wang L, Rantalainen M, Pawitan Y. 2016. Beta-Poisson model for single-cell RNA-seq data analyses. *Bioinformatics*:1–8.
- Wang Z, Zhang J. 2011. Impact of gene expression noise on organismal fitness and the efficacy of natural selection. *Proceedings of the National Academy of Sciences* 108:E67–E76.
- Wolf L, Silander OK, van Nimwegen EJ. 2015. Expression noise facilitates the evolution of gene regulation. *eLife* 4:1–48.
- Wolf YI, Novichkov PS, Karev GP, Koonin EV, Lipman DJ. 2009. The universal distribution of evolutionary rates of genes and distinct characteristics of eukaryotic genes of different apparent ages. *Proceedings of the National Academy of Sciences of the United States of America* 106:7273–7280.
- Xie C, Zhang YE, Chen JY, Liu CJ, Zhou WZ, Li Y, Zhang M, Zhang R, Wei L, Li CY. 2012. Hominoid-Specific De Novo Protein-Coding Genes Originating from Long Non-Coding RNAs. *PLoS Genetics* 8:e1002942.-e1002942.
- Yu H, Kim PM, Sprecher E, Trifonov V, Gerstein M. 2007. The importance of bottlenecks in protein networks: Correlation with gene essentiality and expression dynamics. *PLoS Computational Biology* 3:713–720.
- Zerbino DR, Wilder SP, Johnson N, Juettemann T, Flicek PR. 2015. The ensembl regulatory build. *Genome Biol.* 16:56.

663 **Tables**

664

665 Table 1: GO terms significantly enriched in the 10% genes with lowest transcriptional noise.

|     | <b>Ontology</b> | <b>GO ID</b> | <b>GO term</b>                     | <b>FDR Fisher<br/>"parent-child"</b> | <b>FDR Fisher<br/>"weight01"</b> |
|-----|-----------------|--------------|------------------------------------|--------------------------------------|----------------------------------|
|     | MF              | GO:0003676   | nucleic acid binding               | 2.406E-03                            | 1.475E-08                        |
|     | MF              | GO:0003735   | structural constituent of ribosome | 6.099E-03                            | 1.708E-05                        |
|     | BP              | GO:0006334   | nucleosome assembly                | 3.816E-03                            | 1.380E-02                        |
|     | BP              | GO:0002227   | innate immune response in mucosa   | 6.727E-03                            | 2.018E-02                        |
|     | BP              | GO:0006412   | translation                        | 1.257E-02                            | 1.380E-02                        |
| 666 | CC              | GO:0000788   | nuclear nucleosome                 | 3.493E-05                            | 2.587E-05                        |

667 Note: FDR: False Discovery Rate. MF: Molecular Function. BP: Biological Process. CC: Cellular  
668 Compartment.

669

670 Table 2: Correlation of transcriptional noise with genes centrality measures and pleiotropy.

|     | <b>Measure</b>  | <b>Correlation with F*</b> | <b>p-value</b> |
|-----|-----------------|----------------------------|----------------|
|     | Degree          | -0.069                     | 3.192E-10      |
|     | Hub score       | -0.068                     | 6.132E-10      |
| 671 | Authority score | -0.064                     | 6.151E-09      |
|     | Closeness       | -0.004                     | 7.305E-01      |
|     | Betweenness     | -0.017                     | 1.303E-01      |
|     | Pleiotropy      | -0.046                     | 5.069E-05      |

672 Note: All correlations are computed using Kendall's rank correlation test.

673 Table 3: Correlation of average transcriptional noise with pathway centrality measures.

| Measure                 | Correlation with average F* | p-value   |
|-------------------------|-----------------------------|-----------|
| Size                    | -0.059                      | 1.376E-03 |
| Diameter                | 0.012                       | 5.366E-01 |
| Average degree          | -0.172                      | 8.944E-21 |
| Average hub score       | -0.188                      | 1.724E-24 |
| Average authority score | -0.166                      | 2.487E-19 |
| Average closeness       | 0.050                       | 6.500E-03 |
| Average betweenness     | -0.166                      | 2.487E-19 |
| 674 Average pleiotropy  | -0.137                      | 1.276E-13 |

675 Note: All correlations are computed using Kendall's rank correlation test.

676

677 Table 4: Linear models of transcriptional noise with genomic and epigenomic factors.

|                 | OLS         |        |         | GLS         |        |         | Variance |
|-----------------|-------------|--------|---------|-------------|--------|---------|----------|
|                 | Coefficient | S.E.   | p-value | Coefficient | S.E.   | p-value |          |
| (Intercept)     | 0.5079      | 0.1130 | <0.0001 | 0.5128      | 0.1077 | <0.0001 |          |
| Mean expression | 0.0003      | 0.0001 | 0.0002  | 0.0003      | 0.0001 | 0.0001  | 0.12%    |
| Network PC1     | 0.0485      | 0.0066 | <0.0001 | -0.0482     | 0.0066 | <0.0001 | 1.66%    |
| Network PC2     | -0.0141     | 0.0103 | 0.1724  | -0.0141     | 0.0106 | 0.1867  | 0.11%    |
| Network PC3     | 0.0036      | 0.0096 | 0.7066  | 0.0034      | 0.0099 | 0.7340  | 0.00%    |
| Network PC4     | -0.0065     | 0.0104 | 0.531   | -0.0073     | 0.0108 | 0.5025  | 0.02%    |
| TF PC1          | 0.0029      | 0.0038 | 0.4524  | 0.0029      | 0.0035 | 0.4152  | 0.00%    |
| TF PC2          | 0.0064      | 0.0028 | 0.0206  | 0.0064      | 0.0027 | 0.0169  | 0.19%    |
| TF PC3          | 0.0009      | 0.0038 | 0.8155  | 0.0007      | 0.0037 | 0.8406  | 0.02%    |
| Histone PC1     | -0.0034     | 0.0009 | 0.0001  | -0.0034     | 0.0009 | 0.0001  | 0.48%    |
| Histone PC2     | 0.0003      | 0.0015 | 0.8325  | 0.0004      | 0.0012 | 0.7693  | 0.01%    |
| Ka / Ks         | -0.0209     | 0.0048 | <0.0001 | 0.3683      | 0.1083 | 0.0007  | 1.00%    |
| Age             | 0.3665      | 0.1027 | 0.0004  | -0.0211     | 0.0046 | <0.0001 | 0.31%    |

679 Note: OLS: Ordinary Least Squares. GLS: Generalized Least Squares. Network PC1-4: principal  
680 components of the principal component analysis (PCA) on network measures. TF PCA1-3:  
681 principal components of the logistic PCA on transcription factors binding evidences. Histone PC1-  
682 2: principal components of the logistic PCA on histone modification marks. S.E.: standard error.

## 683 **Figures**

684 Figure 1: A systemic view of gene expression.

685 Figure 2: Transcriptional noise and mean gene expression. A) Measures of noise plotted against the  
686 mean gene expression for each gene, in logarithmic scales together with corresponding regression  
687 lines: variance, Fano factor (variance / mean), noise (square of the coefficient of variation,  
688 variance / mean<sup>2</sup>) and F\* (this study). B) Distribution of F\* over all genes in this study. Vertical  
689 line corresponds to F\* = 1.

690 Figure 3: Enriched pathways in the 10% genes with lowest transcriptional noise.

691 Figure 4: Correlation of F\* with significant principal components of network centrality measures,  
692 transcription factors binding evidences and histone marks presence, as well as gene age and Ka / Ks  
693 ratio.

694

## 695 **Supplementary material:**

696 Table S1: Linear models of transcriptional noise with genomic factors for the bone marrow-derived  
697 dendritic cells data set. Legend as in Table 4.

698 Table S2: Linear models of transcriptional noise with genomic factors with pooled RNA-Seq data.  
699 Legend as in Table 4.

700 Figure S1: Impact of genome organization on the distribution of transcriptional noise. The x-axis  
701 shows the mean relative difference in transcriptional noise. Vertical lines show observed values and  
702 histograms the distribution over 1,000 permutations (see Methods). Left panel: distribution for  
703 neighbor genes along the genome. Right panel: distribution for genes in contact in three-  
704 dimensions.

705 Figure S2: Principal component analysis of network measures. A) Proportion of deviance explained  
706 by models with 1, 2, etc. principal components. B) Loadings of each variable on the 2 first  
707 components. C) Loadings of each variable on the 2<sup>nd</sup> and 3<sup>rd</sup> principal components.

708 Figure S3: Logistic principal component analysis of transcription factor binding evidences. A)  
709 Proportion of deviance explained by models with 1, 2, etc. principal components. B) Loadings of  
710 each variable on the 2 first components. C) Loadings of each variable on the 2<sup>nd</sup> and 3<sup>rd</sup> principal  
711 components.



712 Figure S4: Logistic principal component analysis of histone marks. A) Proportion of deviance  
713 explained by models with 1, 2, etc. principal components. B) Loadings of each variable on the 2  
714 first components.

715 Figure S5: Assortativity in networks. Assortativity for  $F^*$  and hub score are plotted against each  
716 other. Orange line: simple linear model. Blue line: “breakpoint” model. Vertical dashed line show  
717 the minimal value of hub score assortativity from which it has no effect on  $F^*$  assortativity.

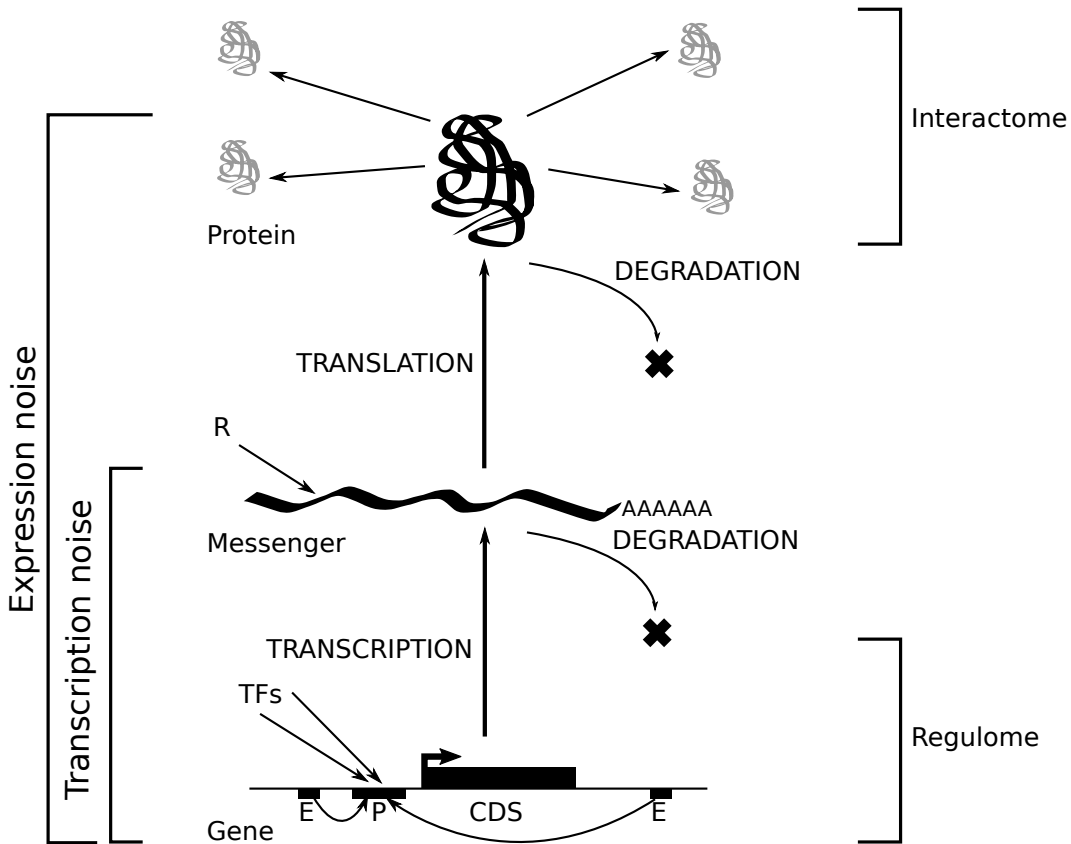

**A**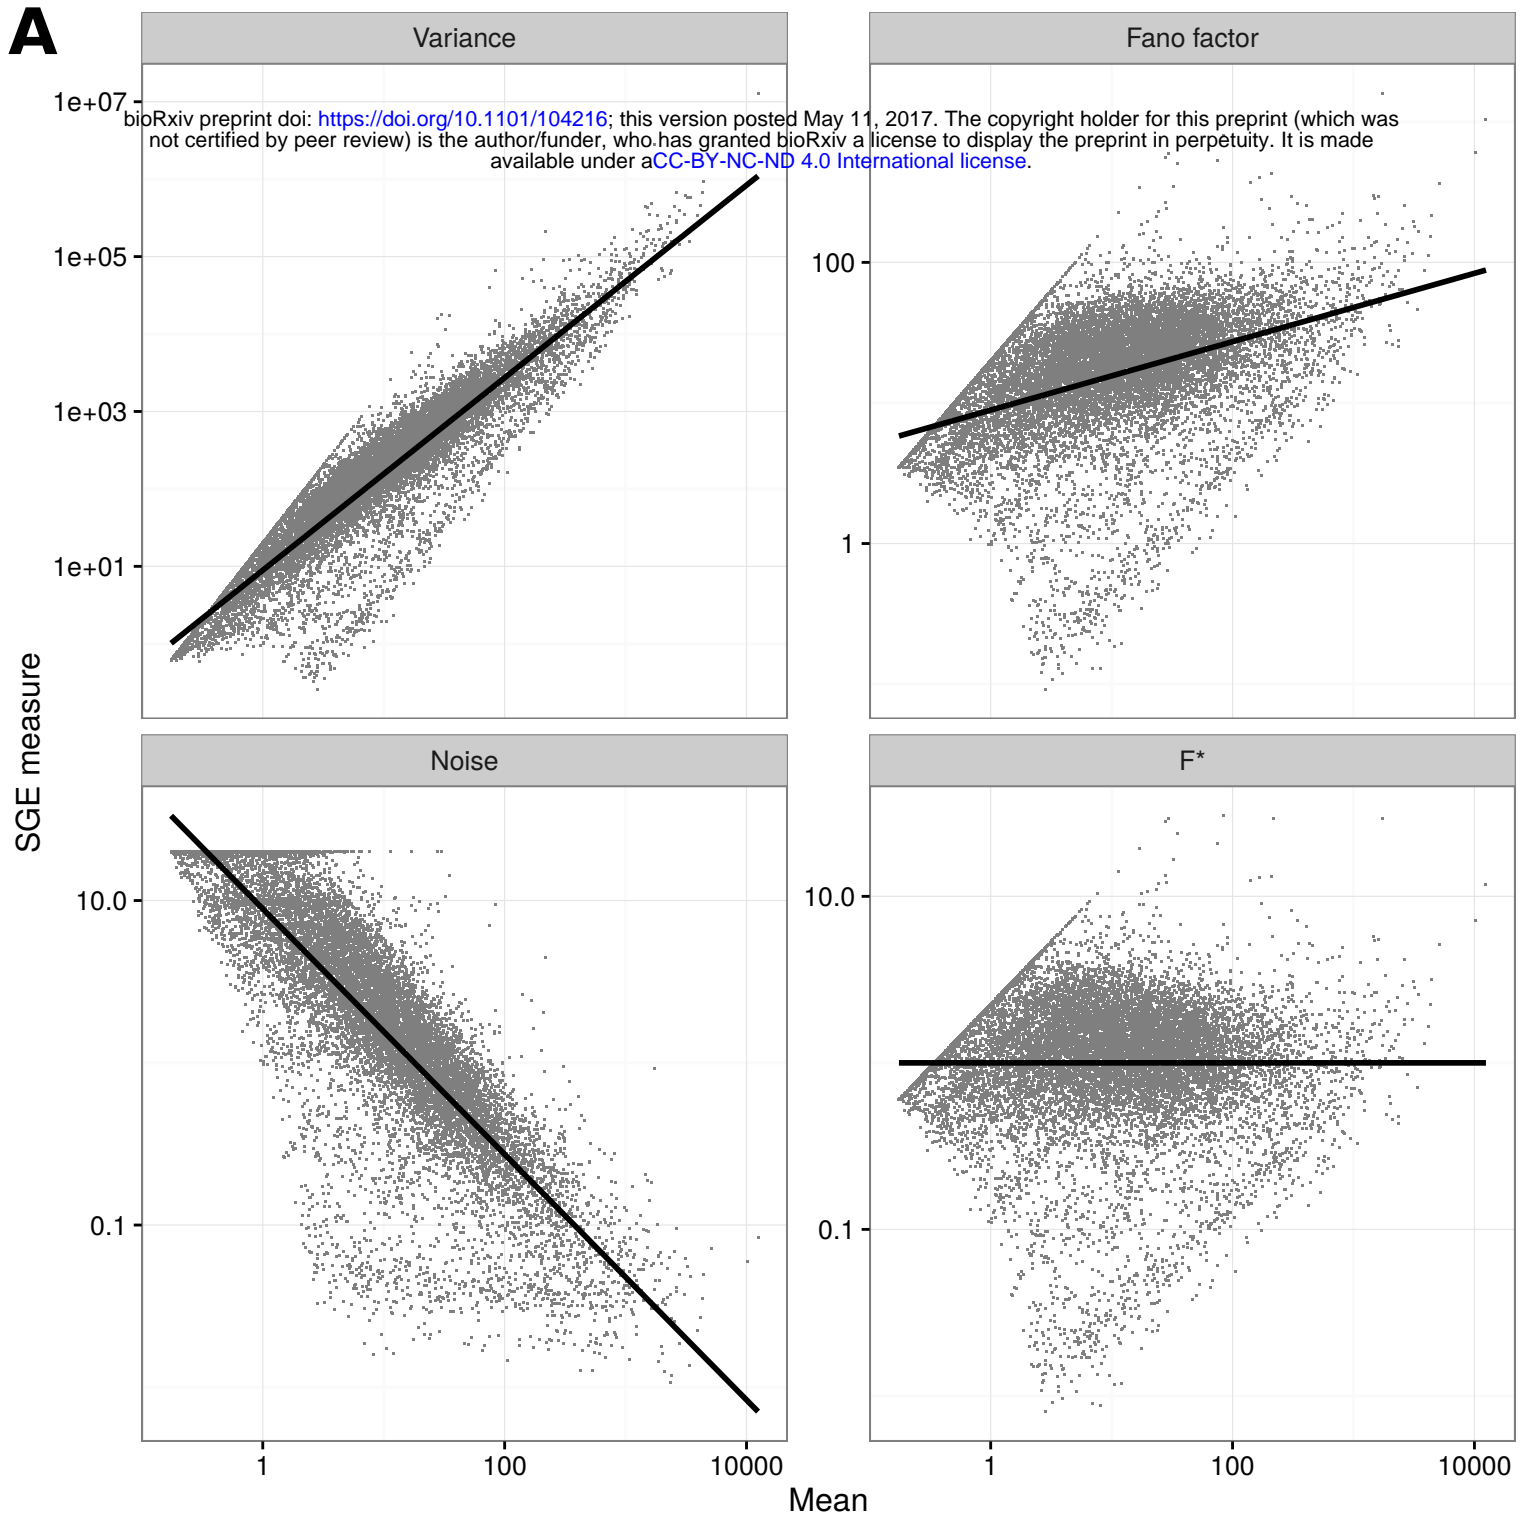**B**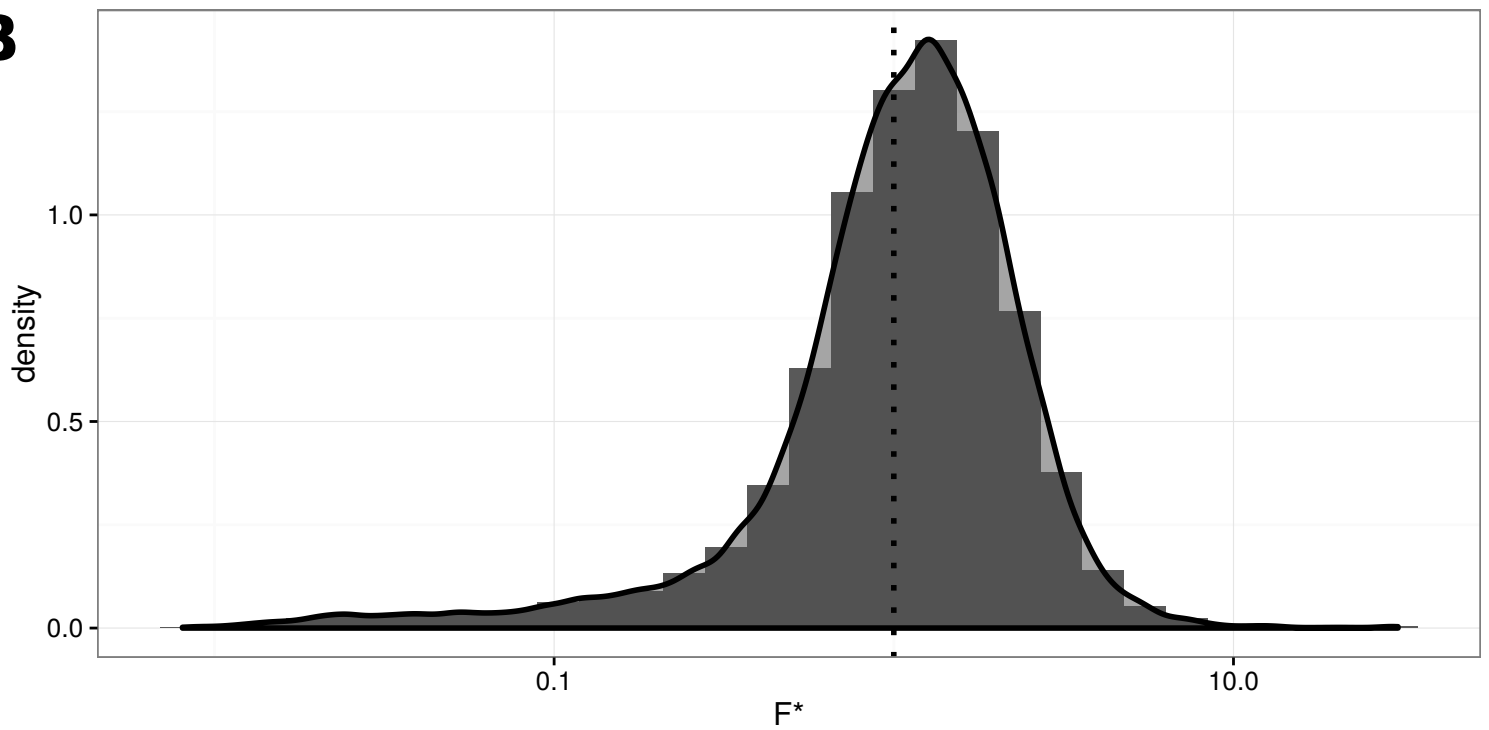

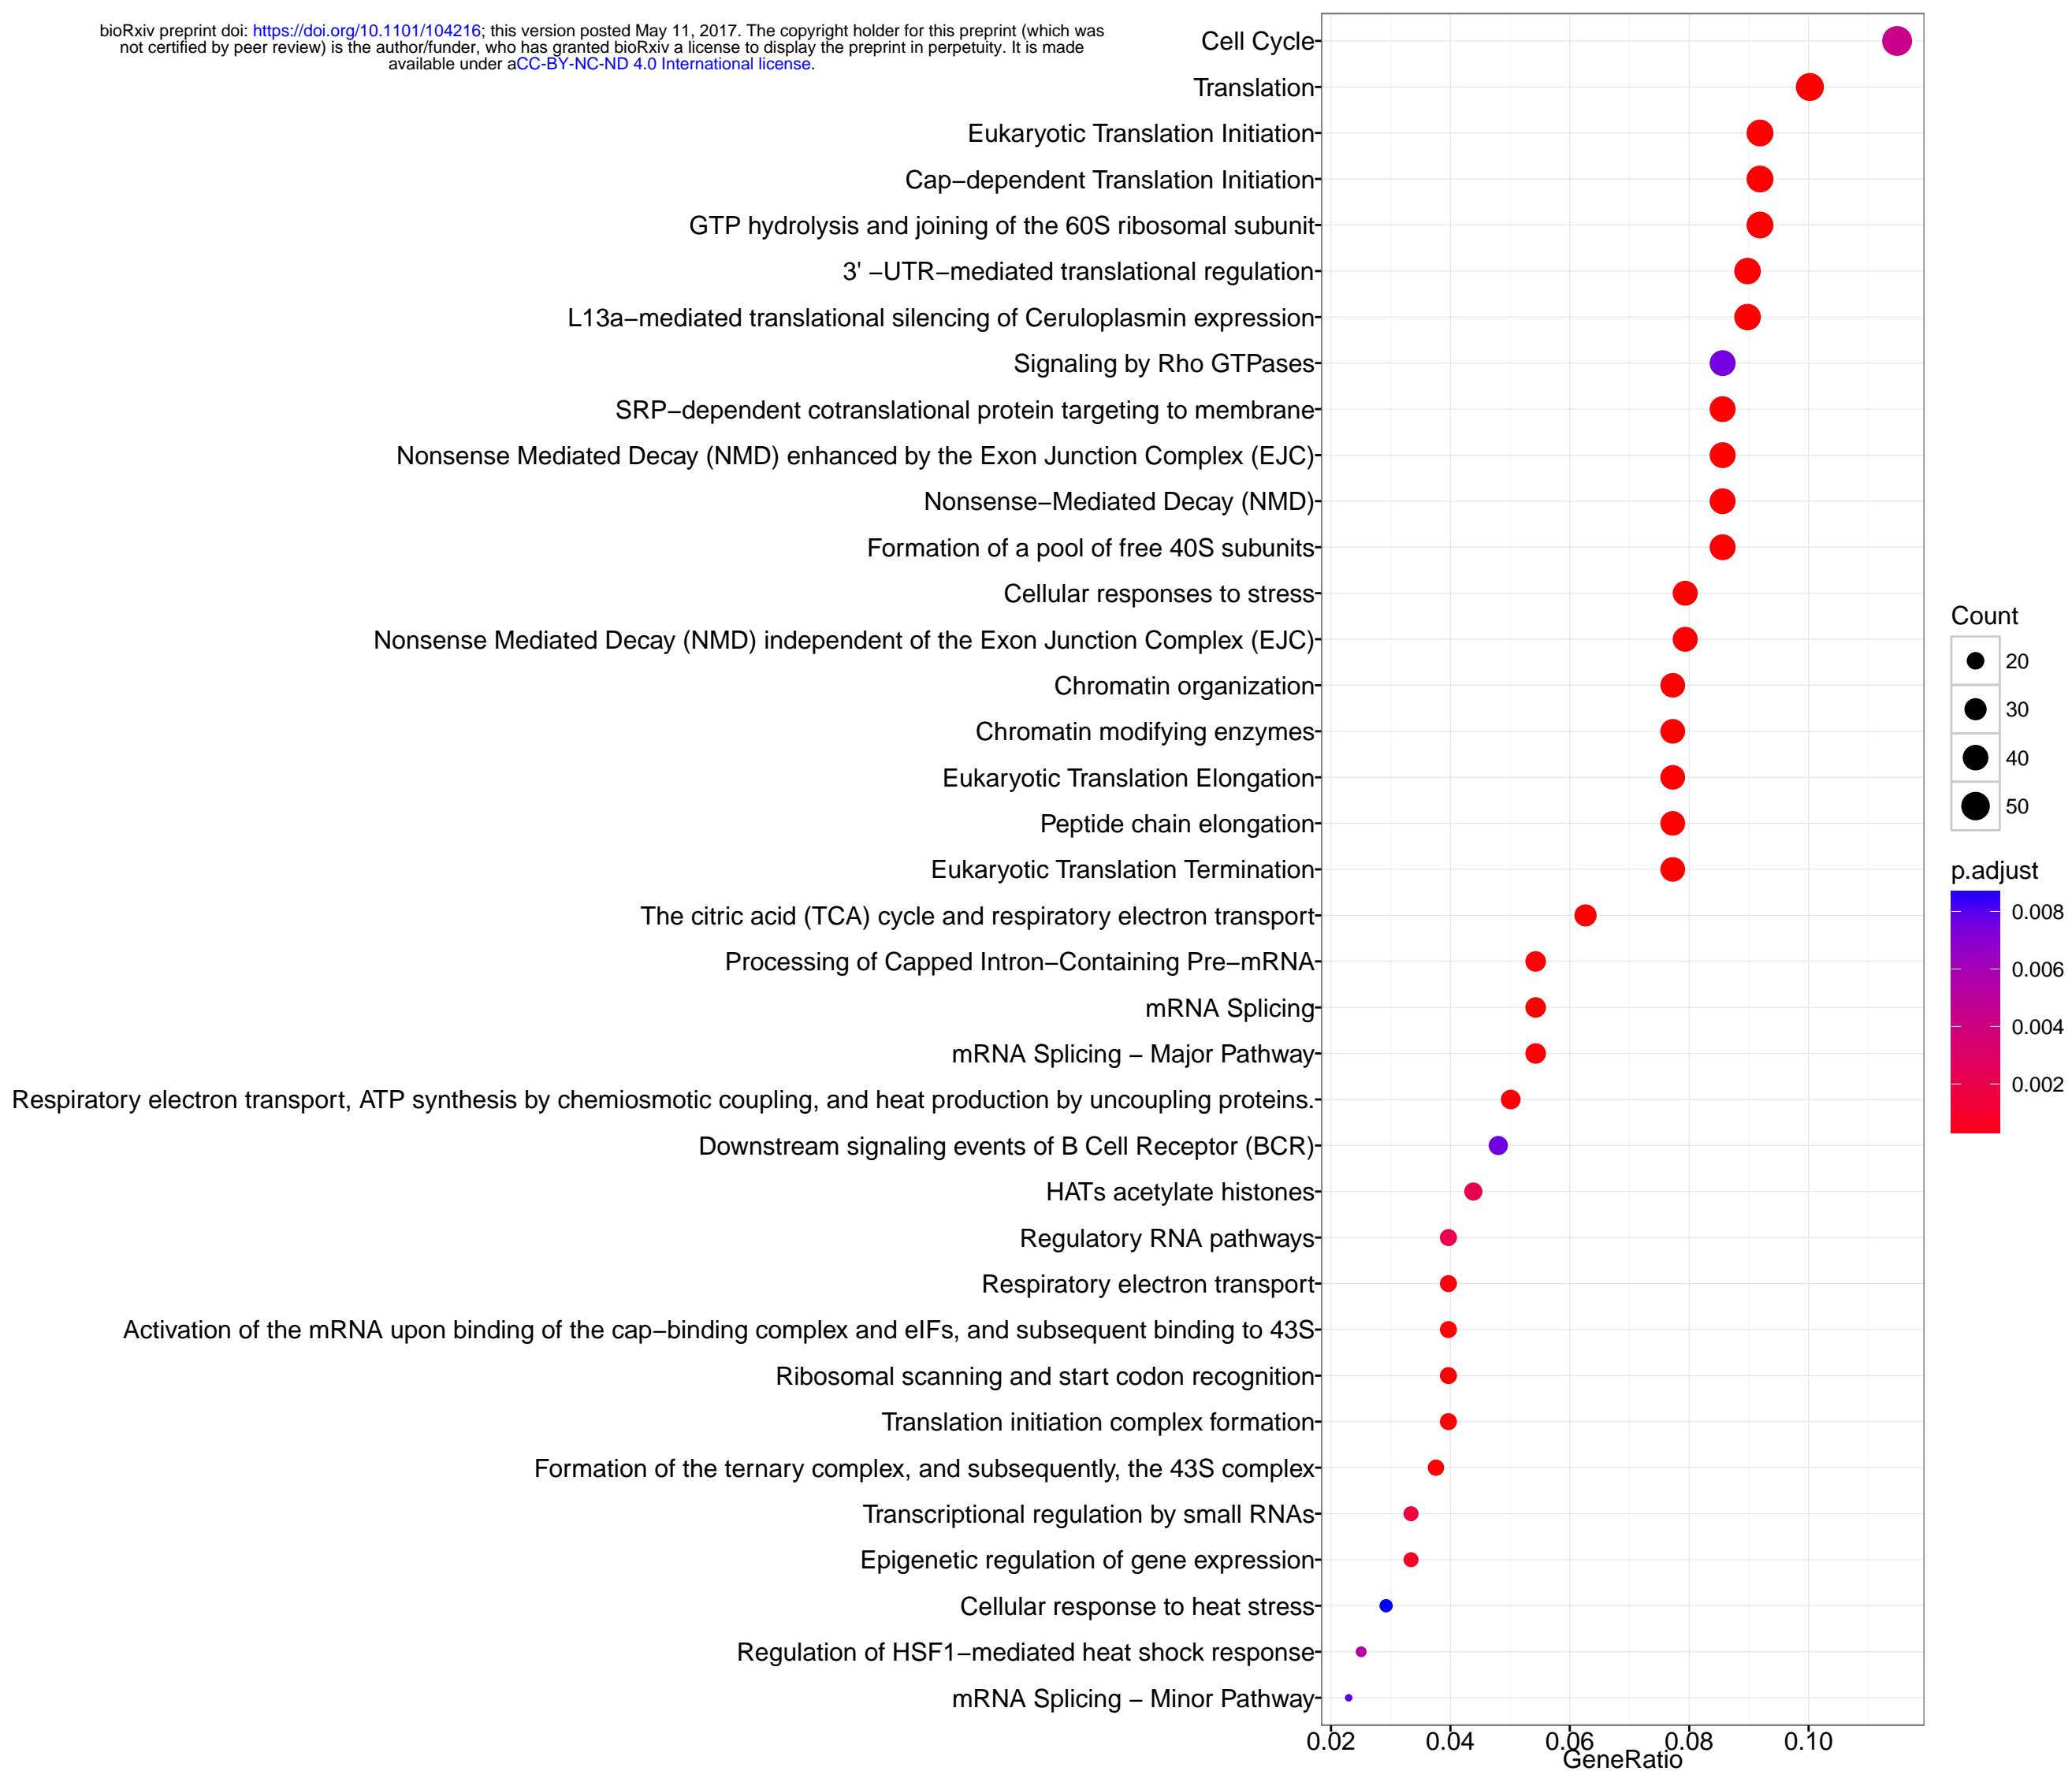

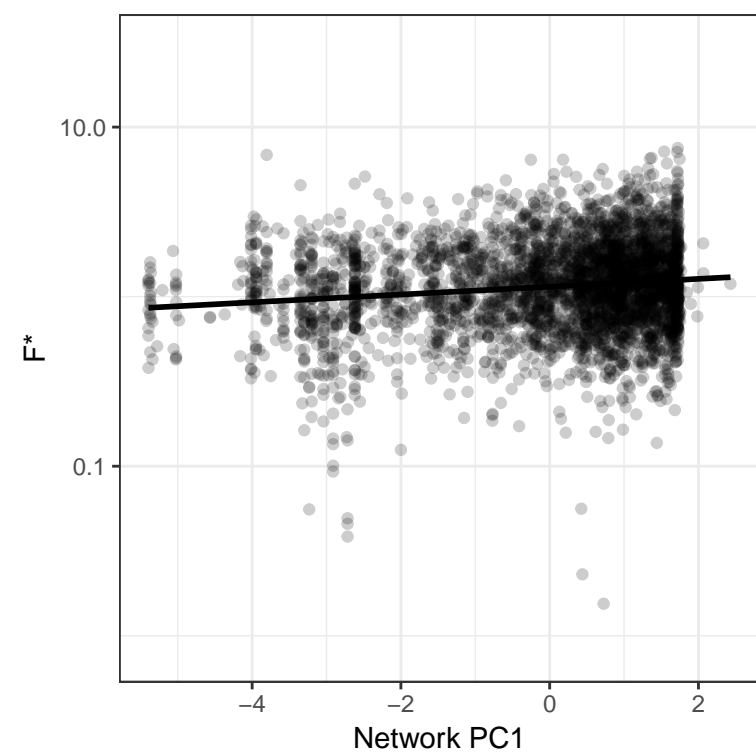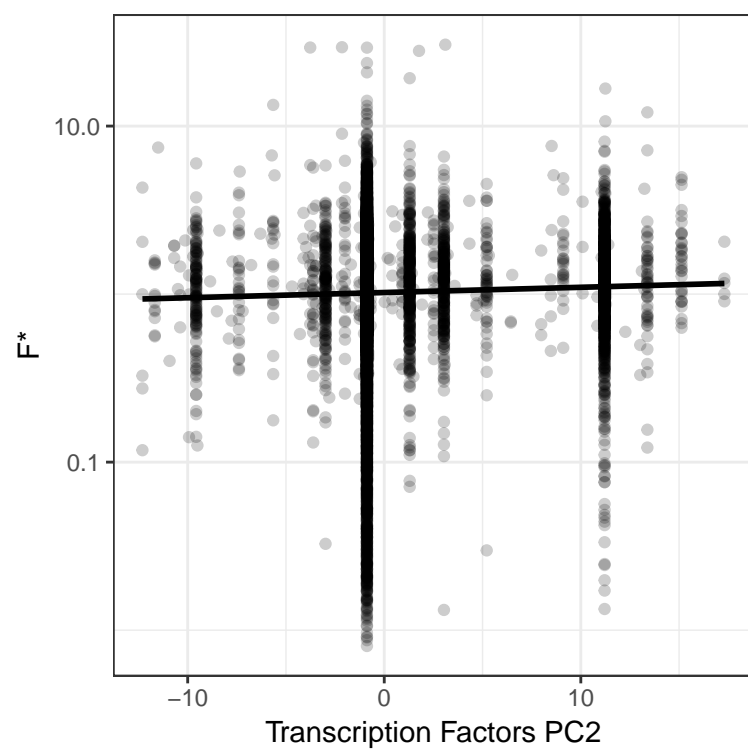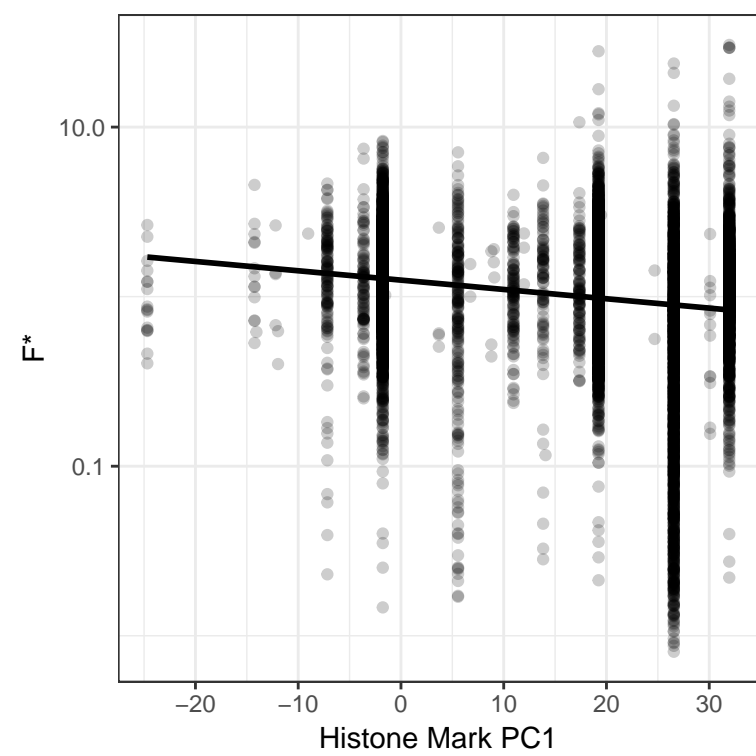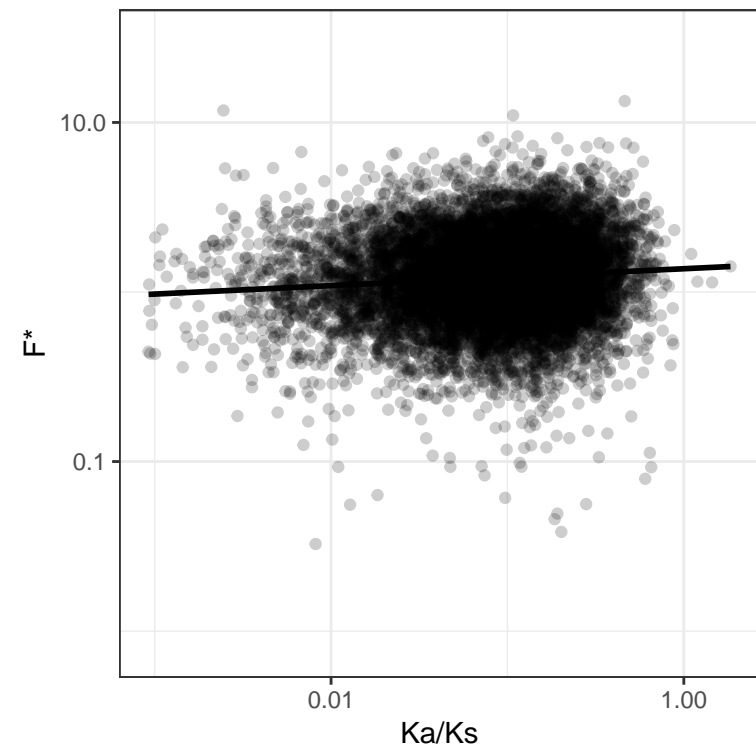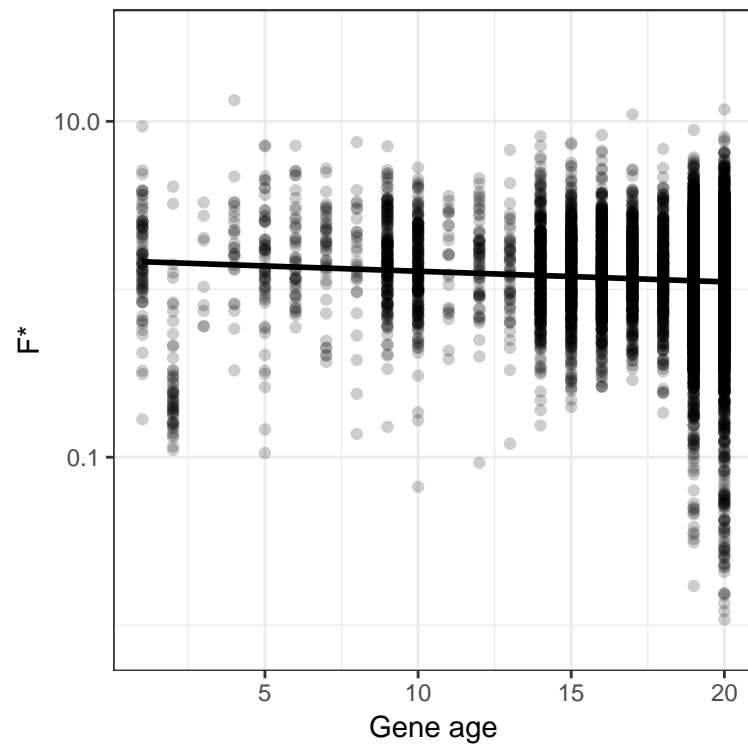

Source: https://www.biorxiv.org/content/10.1101/104216v3.full.pdf
